# Supplementary material
Source: publisher figshare collection journal article supplement (https://acs.figshare.com/ndownloader/files/17344247)
Supplement: Supplementary file 1 [file 17344247]

# Spacer Conjugation and Surface Support Effects in Monolayer Electrochromic Materials.

Nadia O. Laschuk, Adaobi Obua, Iraklii I. Ebraliidze, Holly M. Fruehwald, Jade Poisson, Jacquelyn G. Egan, Franco Gaspari, Fedor Y. Naumkin, E. Bradley Easton, and Olena V. Zenkina\*

Faculty of Science, University of Ontario Institute of Technology, 2000 Simcoe Street North, Oshawa, ON, Canada

\*Corresponding Author. E-mail: olena.zenkina@uoit.ca

## Supporting Information

### Content

|                                                                                                                                   |     |
|-----------------------------------------------------------------------------------------------------------------------------------|-----|
| Synthesis of FTO NPs.....                                                                                                         | S3  |
| Preparation of NP pastes.....                                                                                                     | S3  |
| Deposition of Fe(x-tpy) <sub>2</sub> complexes onto solid substrates.....                                                         | S3  |
| Crystal Structure.....                                                                                                            | S4  |
| Figure S1. Crystallographically determined structure of [Fe(s-Tpy) <sub>2</sub> ](BF <sub>4</sub> ) <sub>2</sub> .....            | S4  |
| Table S1. Crystal data and structure refinement .....                                                                             | S4  |
| Figure S2: Jobs plots in CH <sub>3</sub> CN.....                                                                                  | S5  |
| Characterization of FTO NPs.....                                                                                                  | S5  |
| Figure S3: XRD patterns and BET isotherm for FTO NPs.....                                                                         | S5  |
| Figure S4: Durability at 100 mV/s, Nyquist plot, and capacitance plot for FTO NPs screen-printed film on FTO/glass substrate..... | S6  |
| Cyclic Voltammetry of EC materials.....                                                                                           | S6  |
| CV of ITO-30 NPs on ITO/Glass Substrate.....                                                                                      | S7  |
| Figure S5: CVs of [Fe(s-tpy) <sub>2</sub> ]@ITO-30/ITO/glass.....                                                                 | S7  |
| Figure S6: CVs of [Fe(d-tpy) <sub>2</sub> ]@ITO-30/ITO/glass.....                                                                 | S7  |
| Figure S7: CVs of [Fe(t-tpy) <sub>2</sub> ]@ITO-30/ITO/glass.....                                                                 | S7  |
| CV of ITO-50 NPs on ITO/Glass Substrate.....                                                                                      | S8  |
| Figure S8: CVs of [Fe(s-tpy) <sub>2</sub> ]@ITO-50/ITO/glass .....                                                                | S8  |
| Figure S9: CVs of [Fe(d-tpy) <sub>2</sub> ]@ITO-50/ITO/glass.....                                                                 | S8  |
| CV of FTO NPs on ITO/Glass Substrate.....                                                                                         | S8  |
| Figure S10: CVs of [Fe(s-tpy) <sub>2</sub> ]@FTO/ITO/glass.....                                                                   | S8  |
| Figure S11: CVs of [Fe(d-tpy) <sub>2</sub> ]@FTO/ITO/glass.....                                                                   | S9  |
| Figure S12: CVs of [Fe(t-tpy) <sub>2</sub> ]@FTO/ITO/glass.....                                                                   | S9  |
| CV of FTO NPs on FTO/Glass Substrate .....                                                                                        | S9  |
| Figure S13: CVs of [Fe(s-tpy) <sub>2</sub> ]@FTO/FTO/glass.....                                                                   | S9  |
| Figure S14: CVs of [Fe(d-tpy) <sub>2</sub> ]@FTO/FTO/glass.....                                                                   | S10 |
| Laviron Kinetics.....                                                                                                             | S10 |
| Figure S15: Laviron plots for Fe(s-tpy) <sub>2</sub> deposited on different substrates.....                                       | S10 |
| Figure S16: Laviron plot for Fe(d-tpy) <sub>2</sub> deposited on different substrates .....                                       | S10 |
| Figure S17: Laviron plot for Fe(t-tpy) <sub>2</sub> deposited on different substrates.....                                        | S10 |
| Figure S18: Spectroelectrochemical (SEC) cycling of Fe(s-Tpy) <sub>2</sub> on different substrates .....                          | S11 |

|                                                                                                                                                                                                                                                             |     |
|-------------------------------------------------------------------------------------------------------------------------------------------------------------------------------------------------------------------------------------------------------------|-----|
| Figure S19: SEC cycling of Fe(d-Tpy) <sub>2</sub> deposited on different substrates .....                                                                                                                                                                   | S12 |
| Figure S20: SEC cycling of Fe(t-Tpy) <sub>2</sub> deposited on different substrates .....                                                                                                                                                                   | S13 |
| Coloration Efficiency .....                                                                                                                                                                                                                                 | S14 |
| Figure S21: Coloration efficiencies for Fe(s-tpy) on different substrates .....                                                                                                                                                                             | S14 |
| Figure S22: Coloration efficiencies for Fe(d-tpy) on different substrates .....                                                                                                                                                                             | S14 |
| Figure S23: Coloration efficiencies for Fe(t-tpy) on different substrates .....                                                                                                                                                                             | S14 |
| Figure S24. Contact angle of acetonitrile drop (1μL) on ITO/glass and FTO/glass<br>surfaces .....                                                                                                                                                           | S14 |
| Electrochemical impedance spectroscopy (EIS).....                                                                                                                                                                                                           | S15 |
| Figure S25: EIS data for Fe(t-tpy) on different substrates.....                                                                                                                                                                                             | S15 |
| Figure S26: The relationship between impedance and reciprocal square root of frequency.....                                                                                                                                                                 | S16 |
| Figure S27: Charge distribution in monomethylated complexes.....                                                                                                                                                                                            | S16 |
| Synthesis of 2,2':2':6''-Terpyridine-based Ligands.....                                                                                                                                                                                                     | S16 |
| (E)-4'-(4-(2-(pyridin-4-yl)vinyl)phenyl)-2,2':6',2''-terpyridine aka d-tpy.....                                                                                                                                                                             | S16 |
| 4'-(4-(2-(pyridin-4-yl)ethyl)phenyl)-2,2':6',2''-terpyridine aka s-tpy.....                                                                                                                                                                                 | S17 |
| 4'-(4-(pyridin-4-ylethynyl)phenyl)-2,2':6',2''-terpyridine aka t-tpy.....                                                                                                                                                                                   | S17 |
| Synthesis of Quaternized Ligands.....                                                                                                                                                                                                                       | S17 |
| (4-(4-([2,2':6',2''-terpyridin]-4'-yl)phenethyl)-1-methylpyridin-1-ium)I.....                                                                                                                                                                               | S18 |
| ((E)-4-(4-([2,2':6',2''-terpyridin]-4'-yl)styryl)-1-methylpyridin-1-ium)I.....                                                                                                                                                                              | S18 |
| (4-((4-([2,2':6',2''-terpyridin]-4'-yl)phenyl)ethynyl)-1-methylpyridin-1-ium)I.....                                                                                                                                                                         | S18 |
| Synthesis of Iron(II)-Terpyridine Metal Complexes.....                                                                                                                                                                                                      | S18 |
| [Fe(4'-(4-(2-(pyridin-4-yl)ethyl)phenyl)-2,2':6',2''-terpyridine) <sub>2</sub> ](BF <sub>4</sub> ) <sub>2</sub><br>aka [Fe(s-tpy) <sub>2</sub> ](BF <sub>4</sub> ) <sub>2</sub> .....                                                                       | S18 |
| [Fe((E)-4'-(4-(2-(pyridin-4-yl)vinyl)phenyl)-2,2':6',2''-terpyridine) <sub>2</sub> ](BF <sub>4</sub> ) <sub>2</sub><br>aka [Fe(d-tpy) <sub>2</sub> ](BF <sub>4</sub> ) <sub>2</sub> .....                                                                   | S18 |
| [Fe(4'-(4-(pyridin-4-ylethynyl)phenyl)-2,2':6',2''-terpyridine) <sub>2</sub> ](BF <sub>4</sub> ) <sub>2</sub><br>aka [Fe(t-tpy) <sub>2</sub> ](BF <sub>4</sub> ) <sub>2</sub> .....                                                                         | S19 |
| [Fe(4-(4-([2,2':6',2''-terpyridin]-4'-yl)phenethyl)-1-methylpyridin-1-ium)] <sub>2</sub> I <sub>2</sub> (BF <sub>4</sub> ) <sub>2</sub><br>aka [Fe(CH <sub>3</sub> -s-tpy) <sub>2</sub> ] <sub>2</sub> I <sub>2</sub> (BF <sub>4</sub> ) <sub>2</sub> ..... | S19 |
| [Fe((E)-4-(4-([2,2':6',2''-terpyridin]-4'-yl)styryl)-1-methylpyridin-1-ium)] <sub>2</sub> (BF <sub>4</sub> ) <sub>2</sub><br>aka [Fe(CH <sub>3</sub> -d-tpy) <sub>2</sub> ] <sub>2</sub> I <sub>2</sub> (BF <sub>4</sub> ) <sub>2</sub> .....               | S19 |
| [Fe((4-((4-([2,2':6',2''-terpyridin]-4'-yl)phenyl)ethynyl)-1-methylpyridin-1-ium)I)] <sub>2</sub> (BF <sub>4</sub> ) <sub>2</sub><br>aka [Fe(CH <sub>3</sub> -t-tpy) <sub>2</sub> ] <sub>2</sub> I <sub>2</sub> (BF <sub>4</sub> ) <sub>2</sub> .....       | S19 |
| Figure S28: CVs of 0.1 mM complexes in 0.1 M TBAHFP/MeCN solution.....                                                                                                                                                                                      | S20 |
| Figure S29: IR spectra of tpy ligands and Fe-tpy complexes.....                                                                                                                                                                                             | S20 |
| Figure S30: <sup>1</sup> H NMR spectrum of s-tpy.....                                                                                                                                                                                                       | S21 |
| Figure S31: <sup>1</sup> H NMR spectrum of d-tpy.....                                                                                                                                                                                                       | S21 |
| Figure S32: <sup>1</sup> H NMR spectrum of t-tpy.....                                                                                                                                                                                                       | S21 |
| Figure S33: <sup>1</sup> H NMR spectrum of [Fe(s-tpy) <sub>2</sub> ](BF <sub>4</sub> ) <sub>2</sub> .....                                                                                                                                                   | S22 |
| Figure S34: <sup>1</sup> H NMR spectrum of [Fe(d-tpy) <sub>2</sub> ](BF <sub>4</sub> ) <sub>2</sub> .....                                                                                                                                                   | S22 |
| Figure S35: <sup>1</sup> H NMR spectrum of [Fe(t-tpy) <sub>2</sub> ](BF <sub>4</sub> ) <sub>2</sub> .....                                                                                                                                                   | S22 |
| Figure S36: A sketch of solid-state setup of ECDs.....                                                                                                                                                                                                      | S23 |
| References.....                                                                                                                                                                                                                                             | S23 |

### Synthesis of FTO NPs.

WARNING: HF can be fatal upon contact. A face shield, rubber gloves, and rubber apron were worn in addition to the standard laboratory safety gear. A contact of HF-containing mixtures with any glass or metal parts should be avoided.

$\text{SnCl}_2 \cdot 2\text{H}_2\text{O}$ , 5.05 g (22.4 mmol) and 0.33 mL of 48% HF solution (9.11 mmol) were added to 100 mL  $\text{H}_2\text{O}$ . A mixed solution of 5.0 mL acetylacetone (49 mmol) in 14 mL of methanol was added to the  $\text{SnCl}_2 \cdot 2\text{H}_2\text{O}$  and HF solution dropwise over 45 minutes using rapid stirring. 50%  $\text{NH}_4\text{OH}_{(\text{aq})}$  was added dropwise until gel formation occurred. The dropping rate was monitored until pH 9.5, and the resulting milky white gel solution was stirred overnight. The solution was filtered and washed several times with cold  $\text{H}_2\text{O}$  to remove all  $\text{Cl}^-$  ions, monitoring  $\text{Cl}^-$  ion contamination using 0.1 M  $\text{AgNO}_{3(\text{aq})}$ . The product was dried in an oven at  $100^\circ\text{C}$  for 1 h prior to the addition of 2 mL methanol converting the dry powder to an alcogel. The final product was obtained after 2 h heating at  $600^\circ\text{C}$  then  $700^\circ\text{C}$ . Yield: 2.67 g, 80%.

### Preparation of NP pastes

To prepare the ITO-50 and FTO NP pastes, 75 mL agate jars of PQ-N04 planetary ball milling system (Across International) were first rinsed with anhydrous ethanol. 18 g of 6 mm agate beads were added to one agate jar, and then rinsed with anhydrous ethanol and dried. After formulating the corresponding pastes (see below), they were dispersed in the planetary ball milling system for 24 h at 200 rpm. The pastes were finally obtained by concentrating the dispersed solution under vacuum at  $40^\circ\text{C}$  for 3 h to remove excess ethanol.

The FTO NP paste was formulated adding the listed materials, to the agate jar containing the agate beads in the following order: 1 g of 15 wt% polyvinyl butyral (PVB, molecular weight 40 000-70 000 g/mol) in anhydrous ethanol, 100  $\mu\text{L}$  2-butoxyethanol (0.762 mmol), 70  $\mu\text{L}$  2-[2-(2-methoxyethoxy)ethoxy]acetic acid (0.39 mmol), 15  $\mu\text{L}$  DISPERBYK-111, 0.968 g of  $\alpha$ -Terpineol with butyl carbitol acetate (1:1 w/w), 0.30 g of FTO NPs, and 30 mL anhydrous ethanol.

The ITO-50 NP paste was prepared by adding these materials to the agate jar with agate beads in the following order: 375 mg of  $<50$  nm ITO powder, 1.6 g of 7.5% polyvinyl butyral (PVB, molecular weight 40000-70000 g/mol) in anhydrous ethanol, 0.375 g of 2% sodium docusate (0.0169 mmol) in anhydrous ethanol, 70  $\mu\text{L}$  2-[2-(2-methoxyethoxy)ethoxy]acetic acid (0.39 mmol), 15  $\mu\text{L}$  DISPERBYK-111, 1.06 g propylene glycol, 36  $\mu\text{L}$  glycerol (3%), and 30 mL anhydrous ethanol.

### Deposition of $\text{Fe}(\text{x-tpy})_2$ complexes onto solid substrates

Iron(II) complexes were deposited onto ITO-30, ITO-50, and FTO NP screen printed films on corresponding FTO/glass and ITO/glass substrates using an adapted version of the published procedure.<sup>1</sup> In brief: substrates were submerged in a solution of trichloro(4-(chloromethyl)phenyl)silane with dry hexane (1:100 v/v) in an inert atmosphere. They were left standing for 20 minutes at room temperature, then rinsed in the inert atmosphere with hexane (3 x 15 mL) followed by anhydrous acetonitrile (3 x 15 mL). They were then sonicated (1 x 15 mL) per solvent for 5 min. In an inert atmosphere, the silane-templated substrates were submerged in a pressure tube with 0.4 mM solution of the desired  $\text{Fe}(\text{x-tpy})_2$  complex (where x is s, d, or t), and then heated for 5 days in the dark at  $85^\circ\text{C}$ . They were brought to room temperature, then exposed to air upon rinsing 3 x with acetonitrile, and then hexane. They were sonicated 1 x per solvent for 5 min.

## Crystal Structure

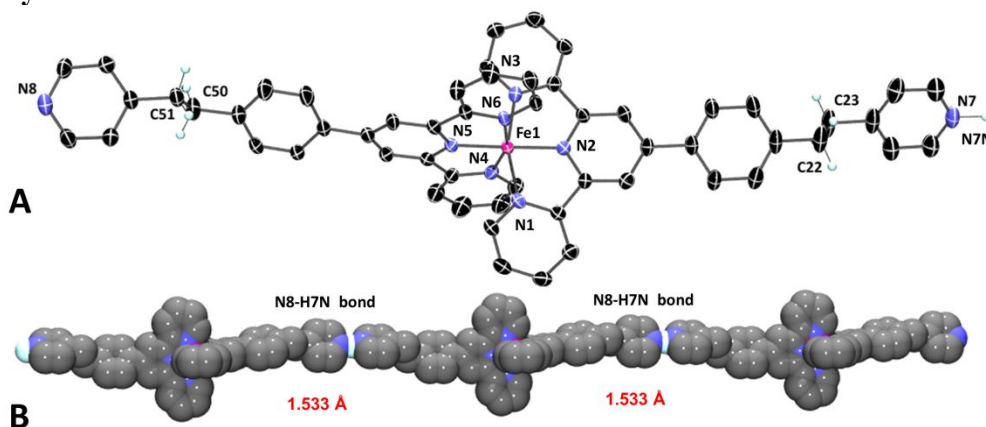

**Figure S1:** **A)** Crystallographically determined structure of mono-protonated version of complex  $[\text{Fe}(\text{s-tpy})_2](\text{BF}_4)_2$  with thermal ellipsoids set at 50%. Hydrogen atoms (except  $\text{CH}_2=\text{CH}_2$  and N-H hydrogens) and  $\text{BF}_4$  counter anions are omitted for clarity. Selected bond lengths (Å) and angles (°): Fe(1)–N(1) 1.968(2), Fe(1)–N(2) 1.874(2), Fe(1)–N(3) 1.965(2), Fe(1)–N(4) 1.967(2), Fe(1)–N(5) 1.877(2), Fe(1)–N(6) 1.978(2), C(22)–C(23) 1.509(5), C(50)–C(52) 1.498(4), N(7)–C(H7) 1.13(5), N(5)–Fe(1)–N(2) 178.79(10), N(3)–Fe(1)–N(4) 93.11(10), N(6)–Fe(1)–N(1) 95.00(16). (See Table S1 for crystal data and structure refinement). **B)** Non-covalent interactions in crystal packing of complex **x**. Weak noncovalent N8...H7A interactions play important role in packing of the complex. N...H distance is 1.533 Å that is significantly lower the sum of van der Waals radii for individual atoms H and N ( $1.20 + 1.55 = 2.75$  Å).

**Table S1.** Crystal data and structure refinement for d17144\_a\_sq.

|                                   |                                             |                             |
|-----------------------------------|---------------------------------------------|-----------------------------|
| Identification code               | d17144_a_sq                                 |                             |
| Empirical formula                 | C60 H54 B2 F8 Fe N8 O                       |                             |
| Formula weight                    | 1059.47                                     |                             |
| Temperature                       | 150(2) K                                    |                             |
| Wavelength                        | 1.54178 Å                                   |                             |
| Crystal system                    | Triclinic                                   |                             |
| Space group                       | P-1                                         |                             |
| Unit cell dimensions              | a = 9.2517(3) Å                             | $\alpha = 110.056(2)^\circ$ |
|                                   | b = 18.0554(5) Å                            | $\beta = 100.932(2)^\circ$  |
|                                   | c = 18.3197(5) Å                            | $\gamma = 99.244(2)^\circ$  |
| Volume                            | 2736.64(14) Å <sup>3</sup>                  |                             |
| Z                                 | 2                                           |                             |
| Density (calculated)              | 1.286 Mg/m <sup>3</sup>                     |                             |
| Absorption coefficient            | 2.815 mm <sup>-1</sup>                      |                             |
| F(000)                            | 1090                                        |                             |
| Crystal size                      | 0.430 x 0.100 x 0.030 mm <sup>3</sup>       |                             |
| Theta range for data collection   | 2.662 to 67.501°                            |                             |
| Index ranges                      | -10 ≤ h ≤ 11, -21 ≤ k ≤ 21, -21 ≤ l ≤ 21    |                             |
| Reflections collected             | 113100                                      |                             |
| Independent reflections           | 9691 [R(int) = 0.0956]                      |                             |
| Completeness to theta = 67.501°   | 98.3 %                                      |                             |
| Absorption correction             | Semi-empirical from equivalents             |                             |
| Max. and min. transmission        | 0.7530 and 0.5726                           |                             |
| Refinement method                 | Full-matrix least-squares on F <sup>2</sup> |                             |
| Data / restraints / parameters    | 9691 / 58 / 717                             |                             |
| Goodness-of-fit on F <sup>2</sup> | 1.056                                       |                             |
| Final R indices [I > 2sigma(I)]   | R1 = 0.0572, wR2 = 0.1429                   |                             |
| R indices (all data)              | R1 = 0.0763, wR2 = 0.1563                   |                             |
| Extinction coefficient            | n/a                                         |                             |
| Largest diff. peak and hole       | 0.358 and -0.583 e.Å <sup>-3</sup>          |                             |

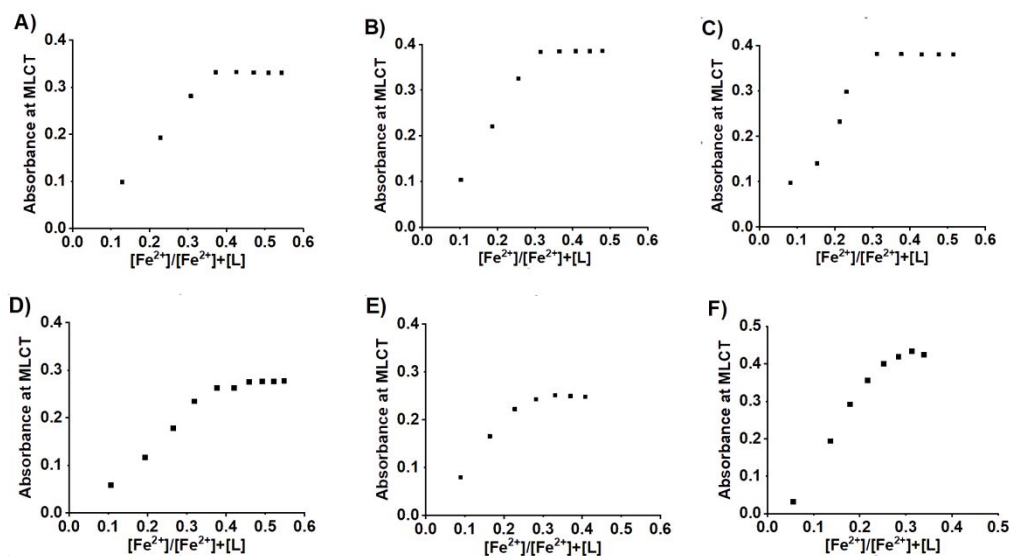

**Figure S2:** Jobs plots in CH<sub>3</sub>CN: **A)** [Fe(s-tpy)<sub>2</sub>(BF<sub>4</sub>)<sub>2</sub>], **B)** [Fe(d-tpy)<sub>2</sub>(BF<sub>4</sub>)<sub>2</sub>], and **C)** [Fe(t-tpy)<sub>2</sub>(BF<sub>4</sub>)<sub>2</sub>], **D)** [Fe(CH<sub>3</sub>-s-tpy)<sub>2</sub>(I)(BF<sub>4</sub>)<sub>2</sub>], **E)** [Fe(CH<sub>3</sub>-d-tpy)<sub>2</sub>(I)(BF<sub>4</sub>)<sub>2</sub>], and **F)** [Fe(CH<sub>3</sub>-t-tpy)<sub>2</sub>(I)(BF<sub>4</sub>)<sub>2</sub>].

### Characterization of FTO NPs

X-Ray diffraction (XRD) pattern for the FTO NPs matches the literature spectrum, containing characteristic peaks for SnO<sub>2</sub> but no detectable peaks for fluorine.<sup>2</sup> The average size of the NPs was calculated using the XRD pattern and the Scherrer equation (**Eq. S1**) where  $\tau$  gives the average particle size,  $\lambda$  is the X-ray source wavelength,  $\beta$  is the width of the peak at half-height, and  $\theta$  is the Bragg angle.

$$\tau = \frac{0.9 \lambda}{\beta \cos \theta} \quad \text{Eq. S1}$$

The average size was 19.57 nm, which is also in good correlation with the literature value.<sup>2</sup>

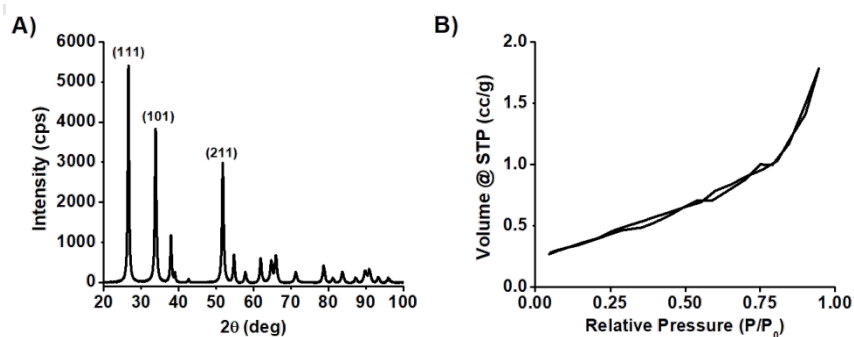

**Figure S3:** **A)** XRD patterns of FTO NPs, **B)** BET isotherm for FTO NPs.

The Brunauer–Emmett–Teller (BET) isotherm plot for the FTO NPs gave the average pore radius of 3.50 nm with surface area 17.62 m<sup>2</sup>/g.

Cyclic voltammetry (CV) was measured for the FTO NPs on the FTO-glass substrate (Figure S3A) in the operating range of −0.13 to 1.7 V vs. Fc/Fc<sup>+</sup>. In the region above 0.75 V vs. Fc/Fc<sup>+</sup>, slight

material decomposition was observed from cycle 100 to 200, and this slowed through additional cycling. Almost no change was observed between cycles 300 and 400. A small peak is visible for the reference electrode  $\text{AgNO}_3$  at 0.04 V vs.  $\text{Fc}/\text{Fc}^+$ . The material experienced capacitance when cycling toward negative potentials beyond 1.0 V vs.  $\text{Fc}/\text{Fc}^+$ , and impedance was thereby measured at -0.02 V, 0.60 V and 1.17 V vs.  $\text{Fc}/\text{Fc}^+$ . While the material experienced resistance near the region of 1.17 V vs.  $\text{Fc}/\text{Fc}^+$ , capacitive behaviors were observed near 0 V vs.  $\text{Fc}/\text{Fc}^+$ . An increase in capacitance is observed for more negative potentials.

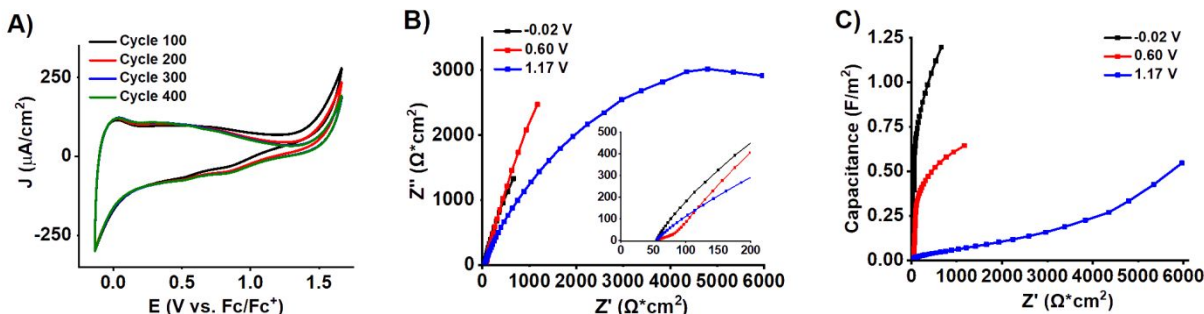

**Figure S4:** A) Durability at 100 mV/s, B) Nyquist plot, and C) capacitance plot for blank FTO NPs screen-printed film on FTO/glass substrate (3 electrode cell, 0.1M TBAHFP/MeCN).

### Cyclic Voltammetry of EC materials

Linear regression of peak current ( $i_p$ ) versus sweep rate ( $\nu$ ) allows for calculation of surface coverage ( $\Gamma$ ) with respect to the specific ECM surface area ( $A_{\text{SUR}}$ ) using equation S2.<sup>3</sup>

$$i_p = \frac{n^2 F^2}{4RT} \nu A_{\text{SUR}} \Gamma \quad \text{Eq. S2}$$

To effectively compare the different substrates, this data was normalized to the BET SA of the corresponding NPs:  $10.2 \text{ m}^2 \text{ g}^{-1}$  for ITO-30,<sup>4</sup>  $30 \text{ m}^2 \text{ g}^{-1}$  for ITO-50, and  $17.62 \text{ m}^2 \text{ g}^{-1}$  for FTO. The surface coverage of redox active complexes applying BET SA is summarized in Table 2 (main text).

### CV of ITO-30 NPs on ITO/Glass Substrate

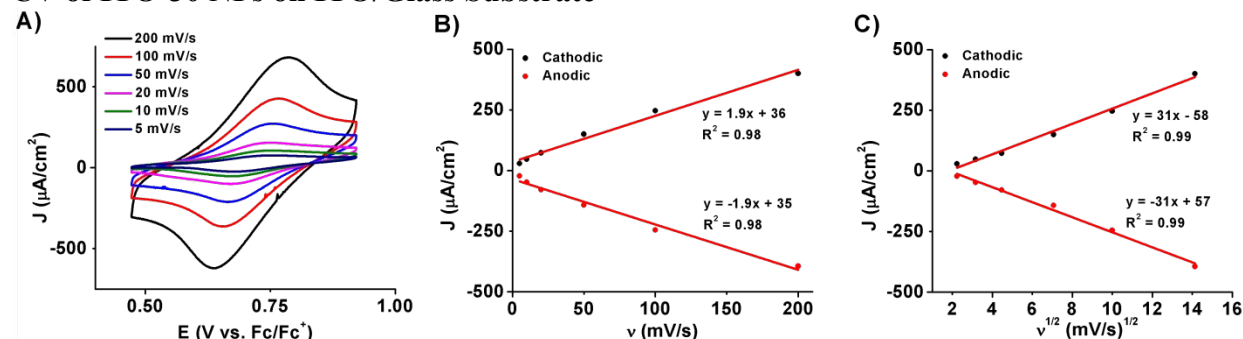

**Figure S5:** CVs of [Fe(s-tpy)<sub>2</sub>]@ITO-30 NP on ITO /glass substrate: **A)** Full CVs, **B)** relationship between current density and sweep rates, **C)** relationship between current density and root of the sweep rate (3 electrode cell, 0.1 M TBAHFP/MeCN).

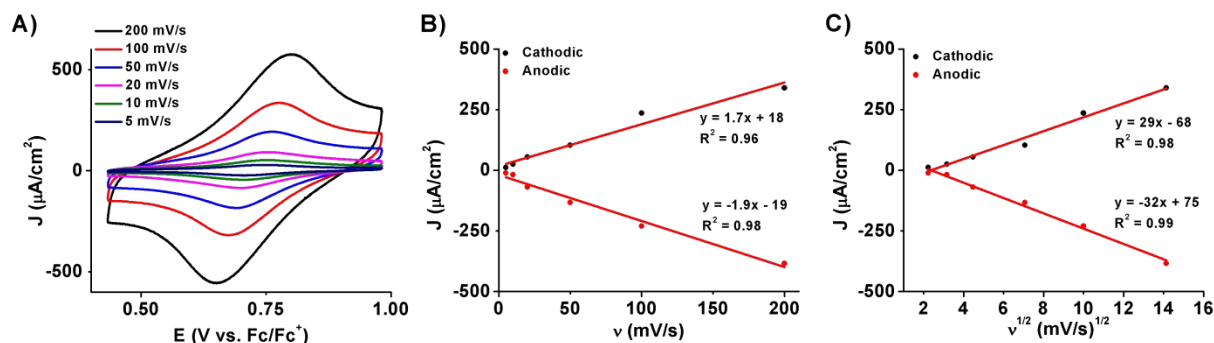

**Figure S6:** CVs of [Fe(d-tpy)<sub>2</sub>]@ITO-30 NP on ITO /glass substrate: **A)** Full CVs, **B)** relationship between current density and sweep rates, **C)** relationship between current density and root of the sweep rate (3 electrode cell, 0.1 M TBAHFP/MeCN).

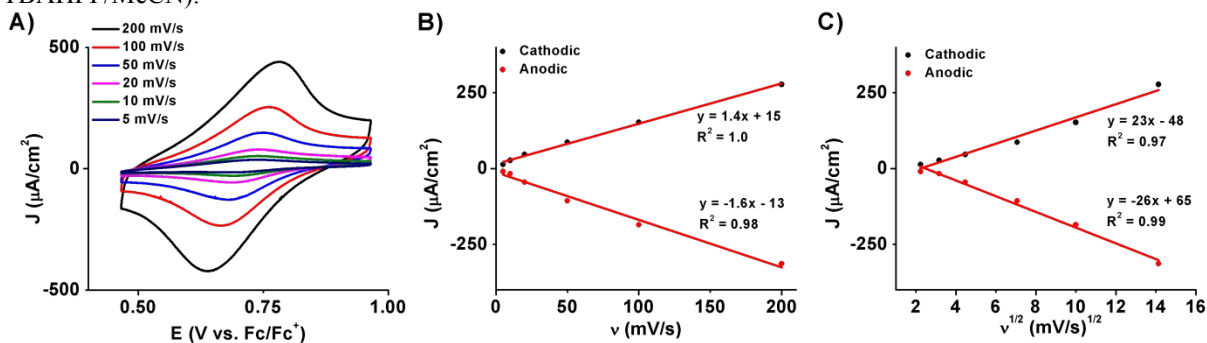

**Figure S7:** CVs of [Fe(t-tpy)<sub>2</sub>]@ITO-30 NP on ITO /glass substrate: **A)** Full CVs, **B)** relationship between current density and sweep rates, **C)** relationship between current density and root of the sweep rate (3 electrode cell, 0.1 M TBAHFP/MeCN).

### CV of ITO-50 NPs on ITO/Glass Substrate

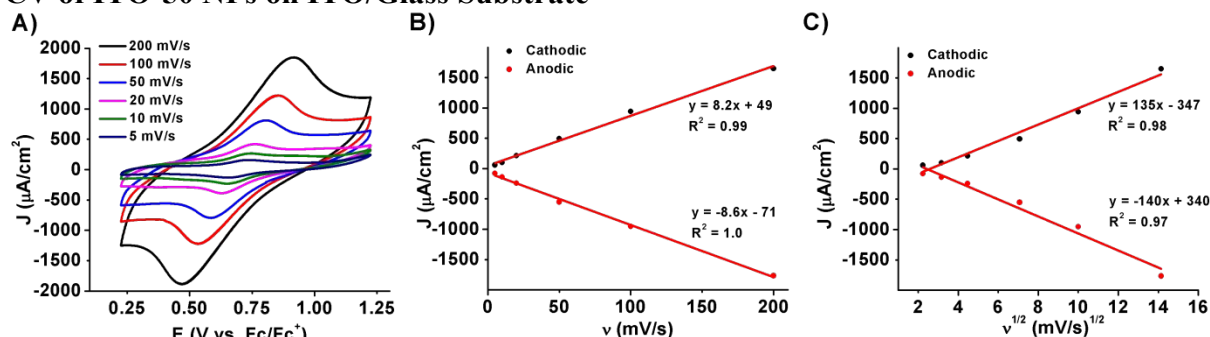

**Figure S8:** CVs of [Fe(s-tpy)<sub>2</sub>]@ITO-50/ITO/glass substrate: **A)** Full CVs, **B)** relationship between current density and sweep rates, **C)** relationship between current density and root of the sweep rate (3 electrode cell, 0.1 M TBAHFP/MeCN).

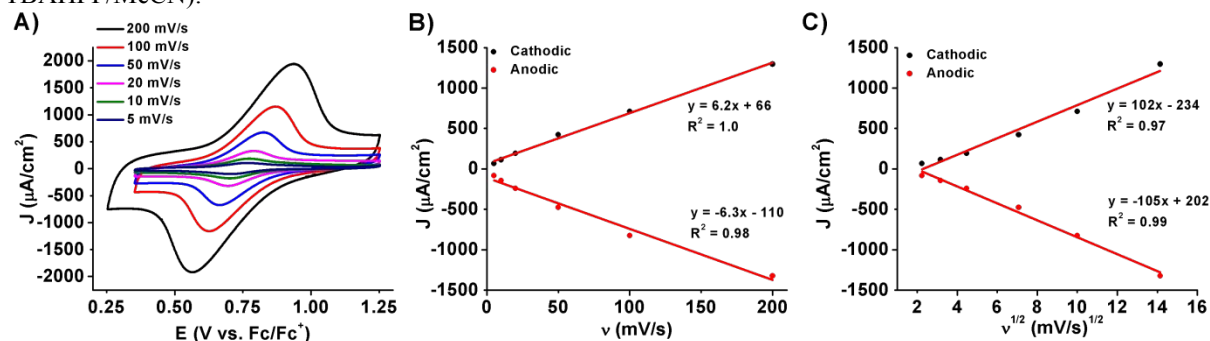

**Figure S9:** CVs of [Fe(d-tpy)<sub>2</sub>]@ITO-50/ITO/glass substrate: **A)** Full CVs, **B)** relationship between current density and sweep rates, **C)** relationship between current density and root of the sweep rate (3 electrode cell, 0.1 M TBAHFP/MeCN).

For CVs of [Fe(t-tpy)<sub>2</sub>]@ ITO-50/ITO/glass substrate: full CVs, relationship between current density and sweep rates, and relationship between current density and root of the sweep rate (3 electrode cell, 0.1 M TBAHFP/MeCN) see **Figure 3 B,C,D** in the main text.

### CV of FTO NPs on ITO/Glass Substrate

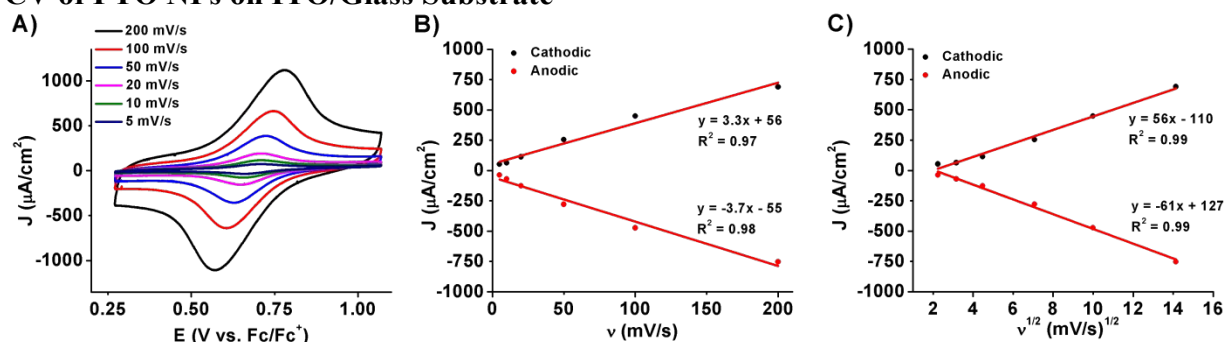

**Figure S10:** CVs of [Fe(s-tpy)<sub>2</sub>]@FTO/ITO/glass substrate: **A)** Full CVs, **B)** relationship between current density and sweep rates, **C)** relationship between current density and root of the sweep rate (3 electrode cell, 0.1 M TBAHFP/MeCN).



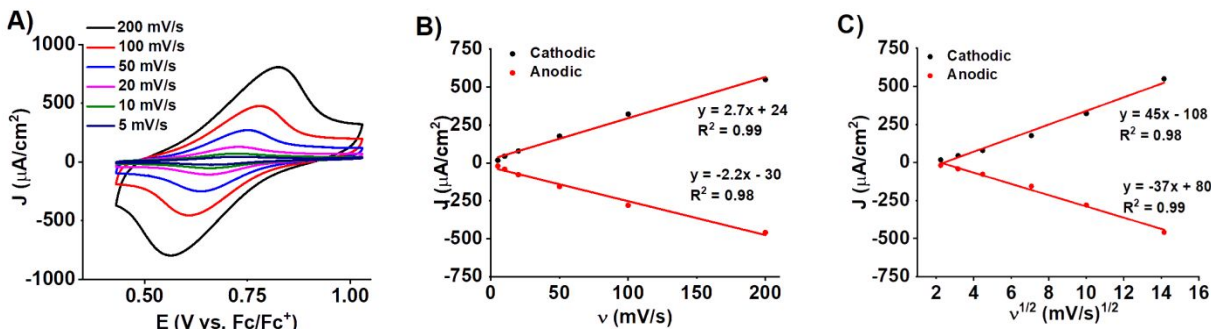

**Figure S11:** CVs of  $[\text{Fe}(\text{d-tpy})_2]$ @FTO/ITO/glass substrate: **A)** Full CVs, **B)** relationship between current density and sweep rates, **C)** relationship between current density and root of the sweep rate (3 electrode cell, 0.1 M TBAHFP/MeCN).

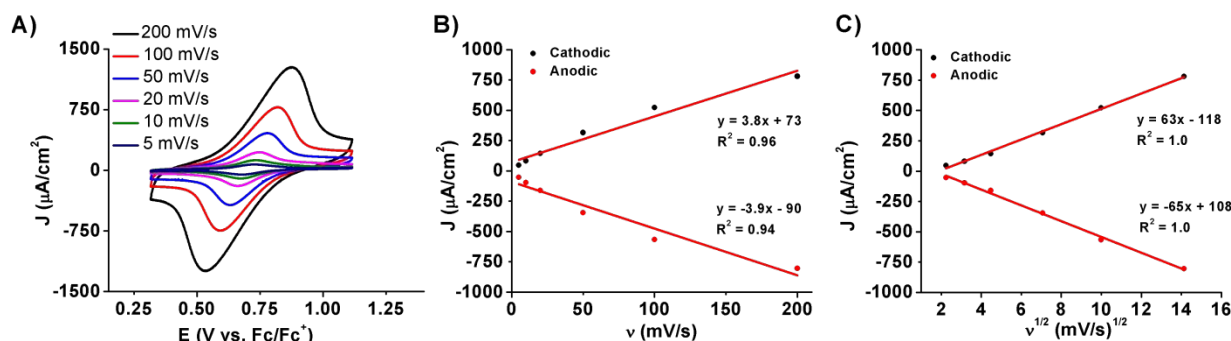

**Figure S12:** CVs of  $[\text{Fe}(\text{t-tpy})_2]$ @FTO/ITO/glass substrate: **A)** Full CVs, **B)** relationship between current density and sweep rates, **C)** relationship between current density and root of the sweep rate (3 electrode cell, 0.1 M TBAHFP/MeCN).

### CV of FTO NPs on FTO/Glass Substrate

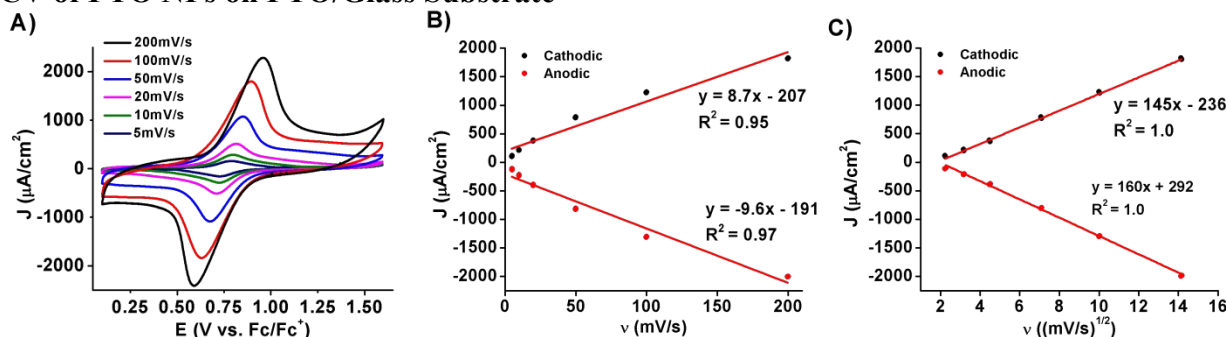

**Figure S13:** CVs of  $[\text{Fe}(\text{s-tpy})_2]$ @FTO/FTO/glass substrate: **A)** Full CVs, **B)** relationship between current density and sweep rates, **C)** relationship between current density and root of the sweep rate (3 electrode cell, 0.1 M TBAHFP/MeCN).

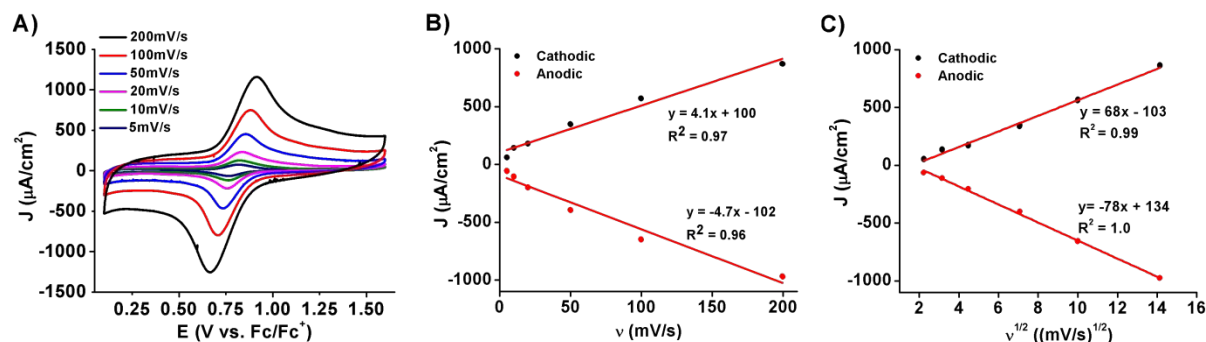

**Figure S14:** CVs of  $[\text{Fe}(\text{d-tpy})_2]@\text{FTO}/\text{FTO}/\text{glass}$  substrate: **A)** Full CVs, **B)** relationship between current density and sweep rates, **C)** relationship between current density and root of the sweep rate (3 electrode cell, 0.1 M TBAHFP/MeCN).

For CVs of  $[\text{Fe}(\text{t-tpy})_2]@\text{FTO}/\text{FTO}/\text{glass}$  substrate: full CVs, linear relationship between current density and sweep rates, and linear relationship between current density and root of the sweep rate (3 electrode cell, 0.1 M TBAHFP/MeCN) see **Figure 3** E, F, G in the main text.

### Laviron Kinetics

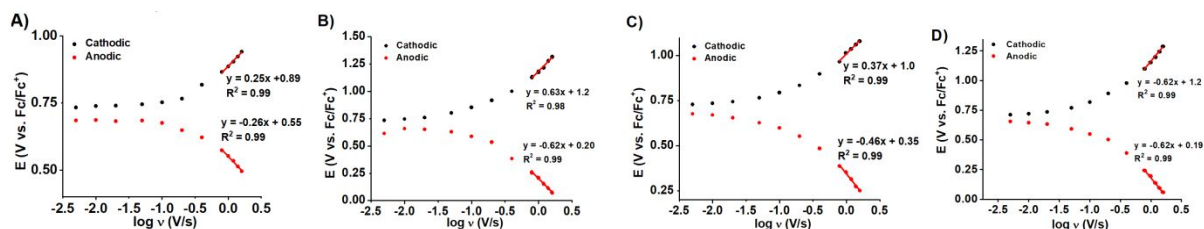

**Figure S15:** Laviron plot for  $[\text{Fe}(\text{s-tpy})_2]$  on **A)** ITO-30 on ITO/glass, **B)** ITO-50 on ITO/glass, **C)** FTO on ITO/glass, and **D)** FTO on FTO/glass.

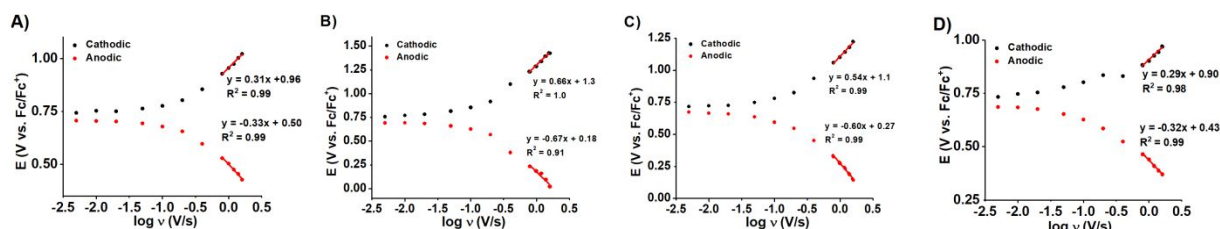

**Figure S16:** Laviron plot for  $[\text{Fe}(\text{d-tpy})_2]$  on **A)** ITO-30 on ITO/glass, **B)** ITO-50 on ITO/glass, **C)** FTO on ITO/glass, and **D)** FTO on FTO/glass.

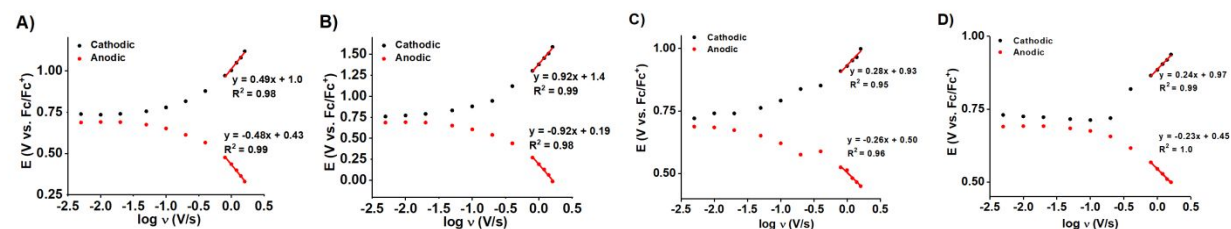

**Figure S17:** Laviron plot for  $[\text{Fe}(\text{t-tpy})_2]$  on **A)** ITO-30 on ITO/glass, **B)** ITO-50 on ITO/glass, **C)** FTO on ITO/glass, and **D)** FTO on FTO/glass.

## Spectroelectrochemical (SEC) properties.

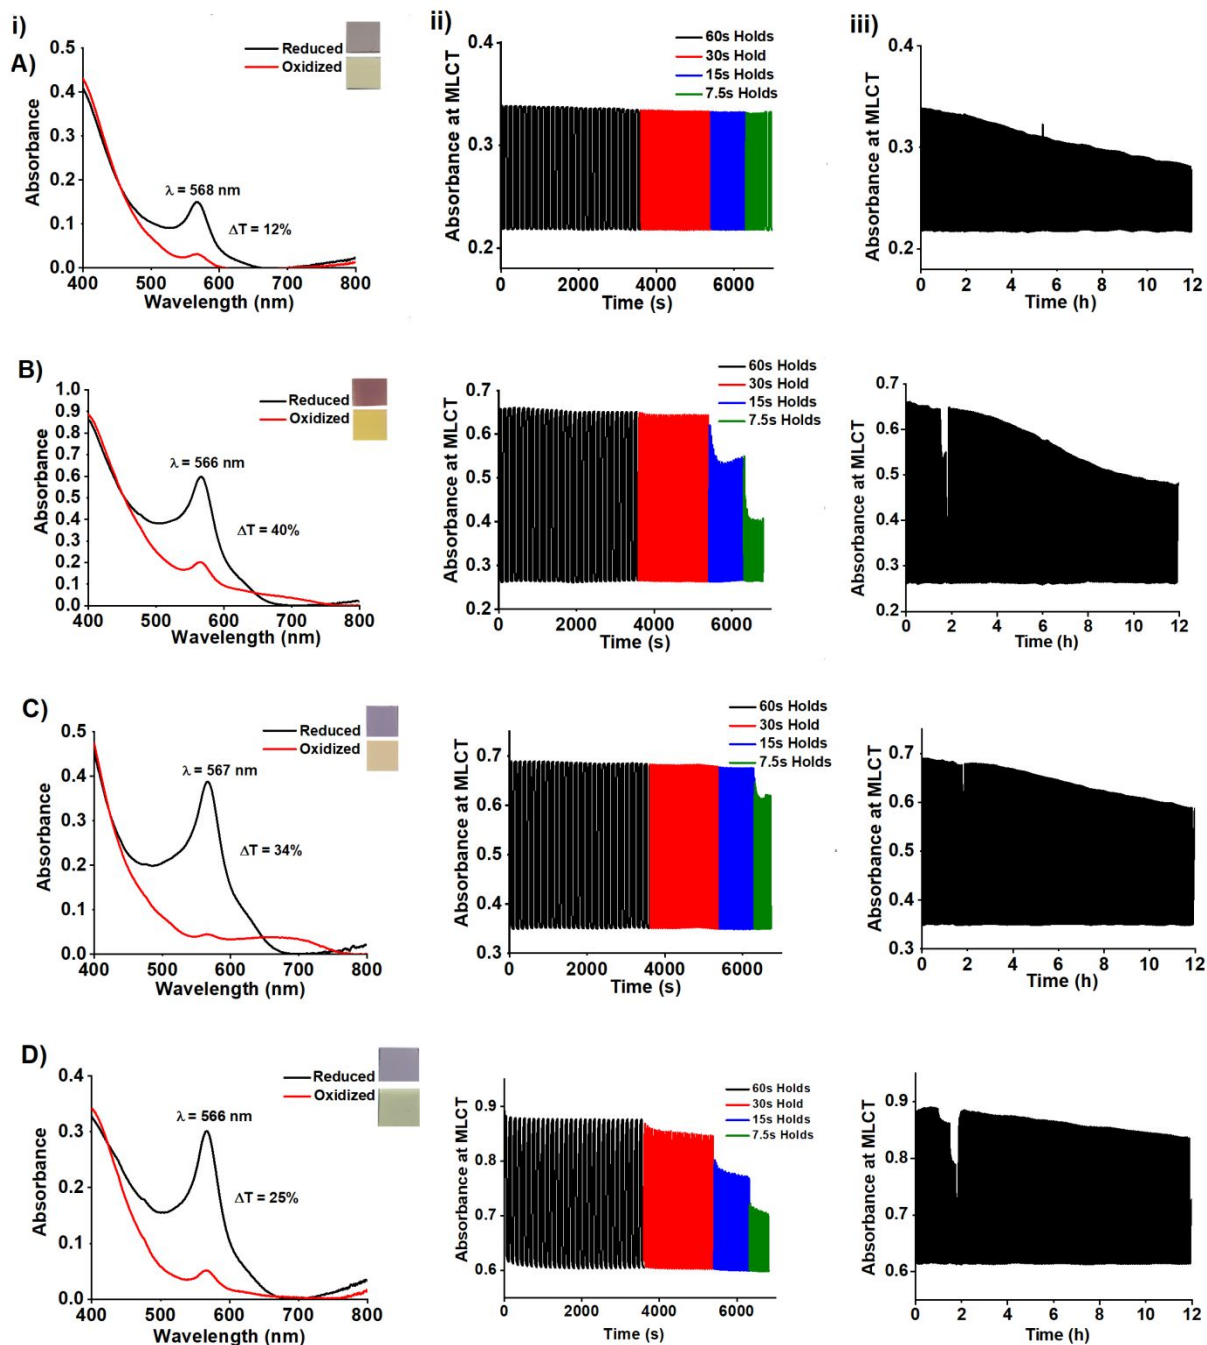

**Figure S18:** SEC cycling between -1V to +3V for  $[\text{Fe}(\text{s-tpy})_2]$ : **i)** UV-Vis, **ii)** different speeds of cycling down (30 cycles/speed), and **iii)** long term durability 60 s/hold, where the complex is anchored on **A)** ITO-30/ITO/glass, **B)** ITO-50/ITO/glass, **C)** FTO/ITO/glass, and **D)** FTO/FTO/glass (2 electrode cell,  $\text{Li}^+$  electrolyte).

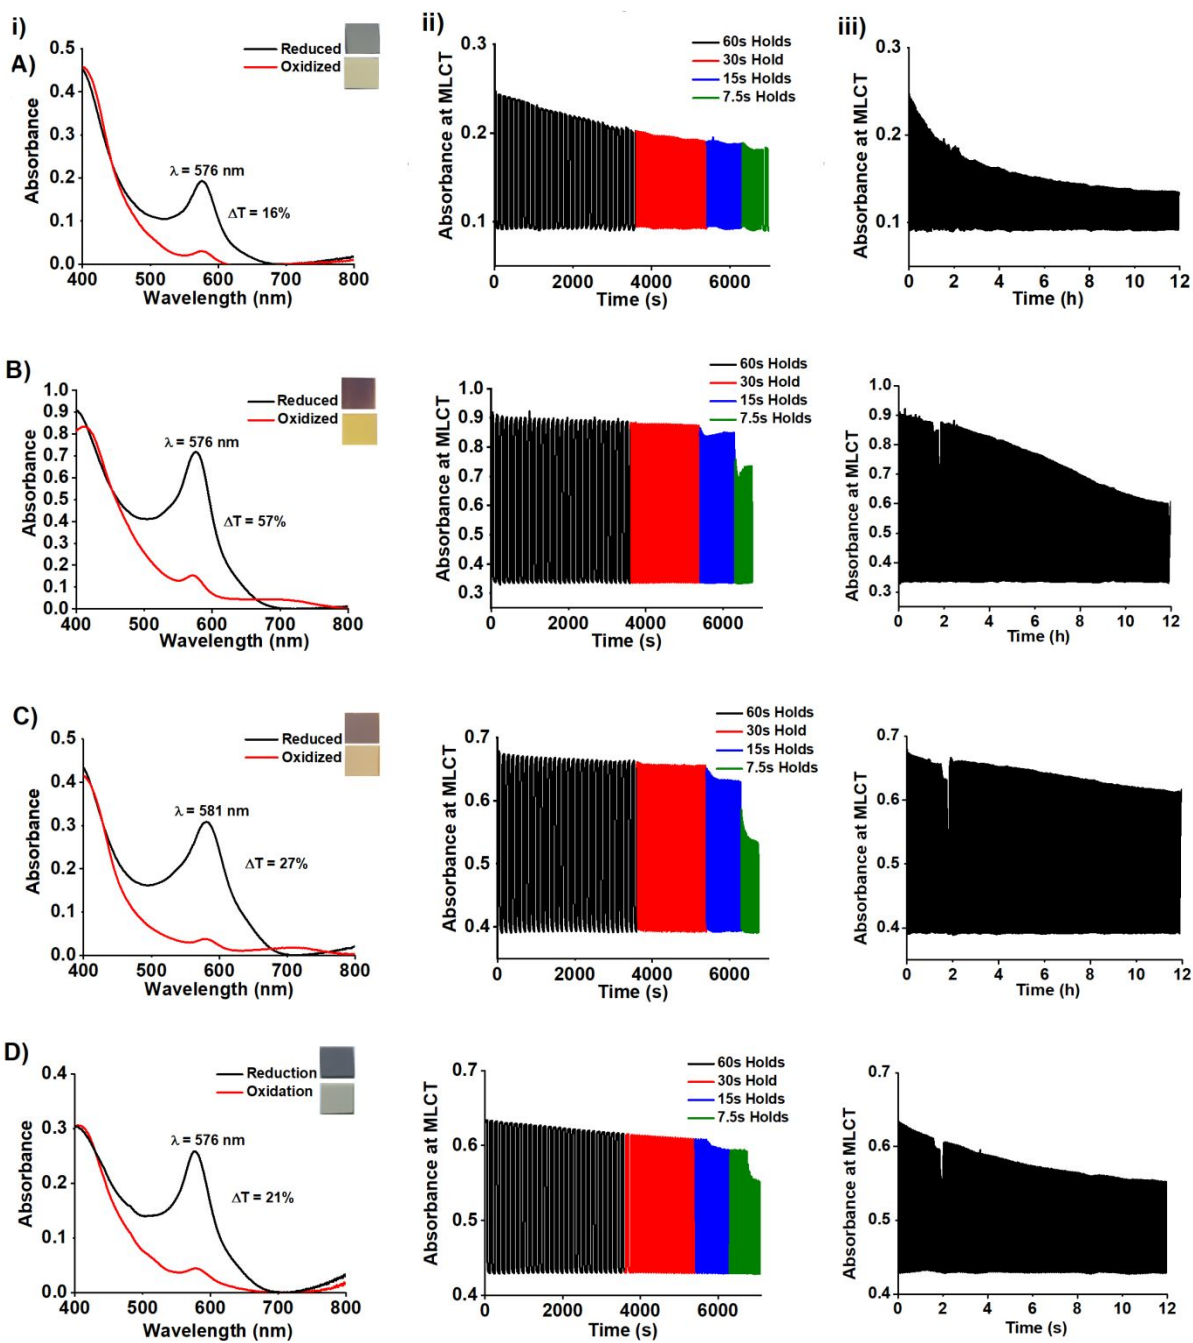

**Figure S19:** SEC cycling between -1V to +3V for  $[\text{Fe}(\text{d-tpy})_2]$ : **i)** UV-Vis, **ii)** different speeds of cycling down (30 cycles/speed), and **iii)** long term durability 60 s/hold, where the complex is anchored on **A)** ITO-30/ITO/glass, **B)** ITO-50/ITO/glass, **C)** FTO/ITO/glass, and **D)** FTO/FTO/glass (2 electrode cell,  $\text{Li}^+$  electrolyte).

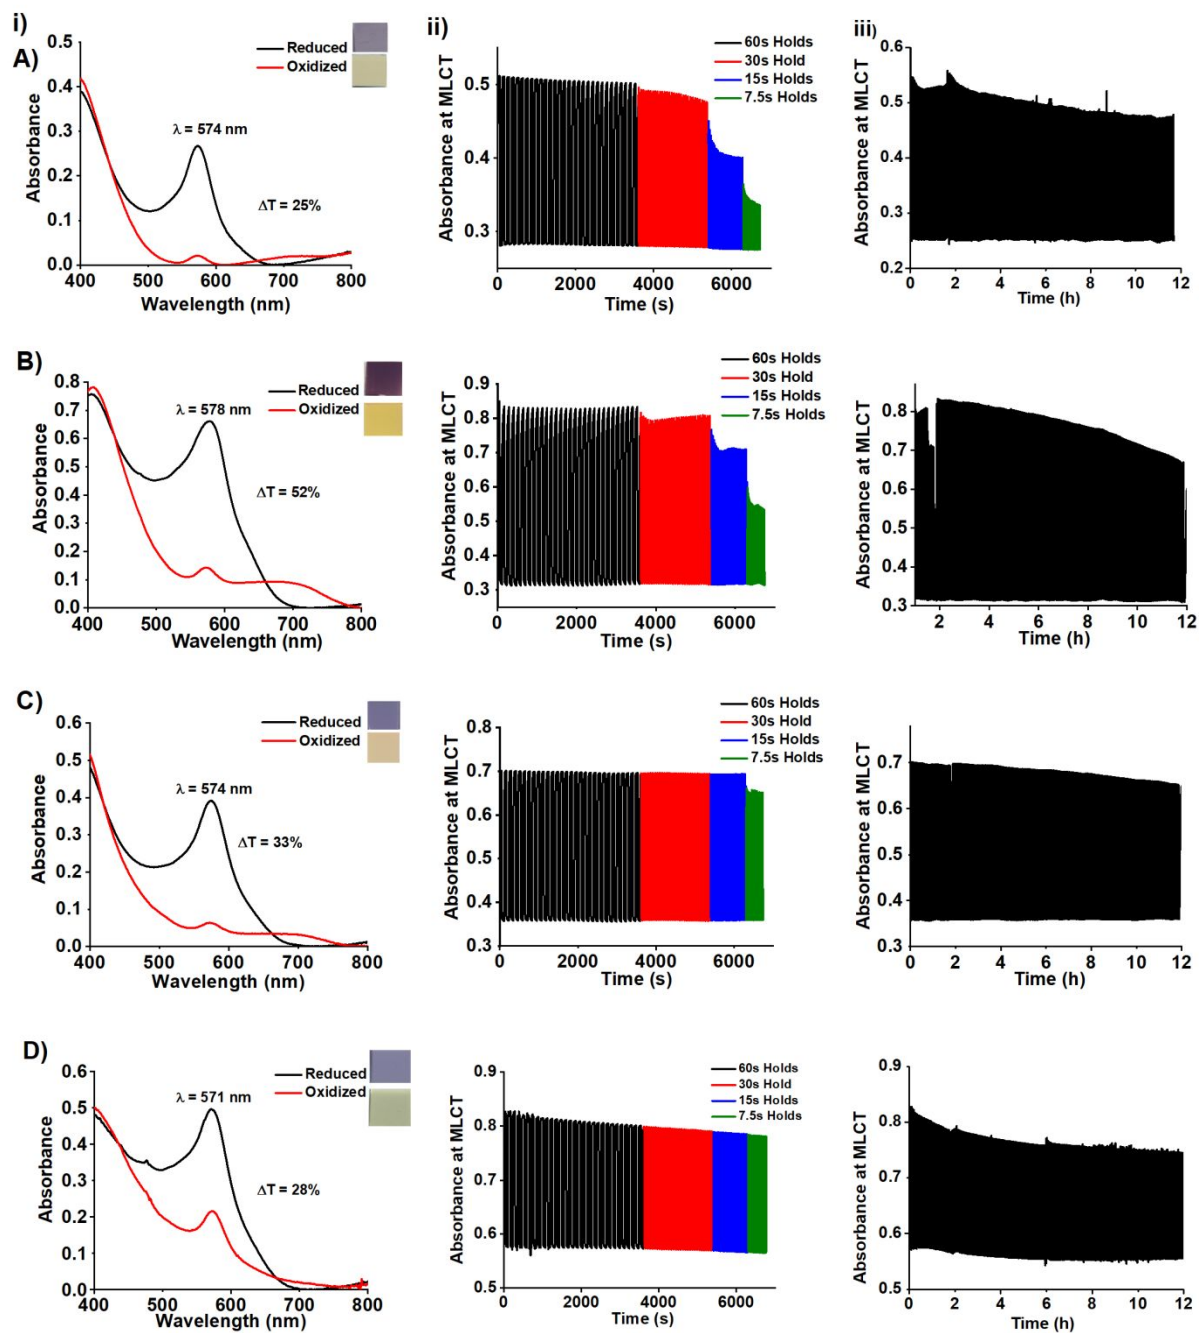

**Figure S20:** SEC cycling between -1V to +3V for  $[\text{Fe}(\text{t-tpy})_2]$ : **i)** UV-Vis, **ii)** different speeds of cycling down (30 cycles/speed), and **iii)** long term durability 60 s/hold, where **A)** ITO-30 on ITO/glass, **B)** ITO-50 on ITO/glass, **C)** FTO on ITO/glass, and **D)** FTO on FTO/glass (2 electrode cell,  $\text{Li}^+$  electrolyte).



## Coloration Efficiency

It was demonstrated for electrochemical supercapacitors that specific capacitance depends on the accessibility of the surface area by the electrolyte. The relationship has an optimal ratio for the surface area to electrolyte ion radius, thus explains the discrepancies between ITO-30 NPs and the ITO-50.<sup>5</sup>

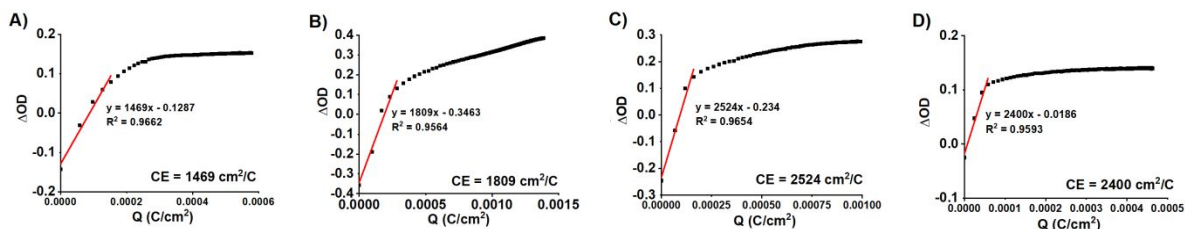

**Figure S21:** Coloration efficiencies for [Fe(s-tpy)<sub>2</sub>] on **A)** ITO-30/ITO/glass, **B)** ITO-50/ITO/glass, **C)** FTO/ITO/glass, and **D)** FTO/FTO/glass (solid state, -1V).

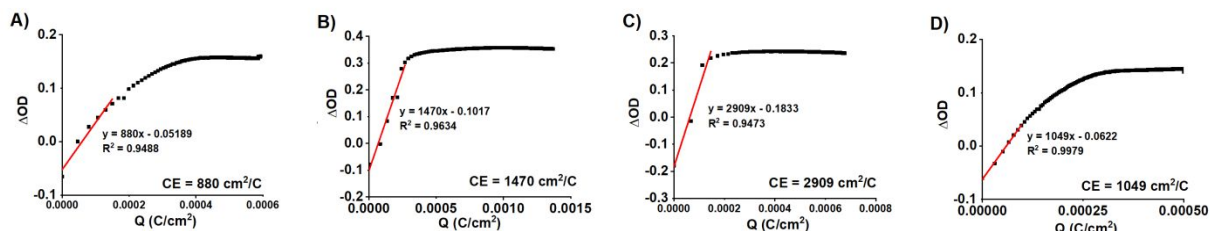

**Figure S22:** Coloration efficiencies for [Fe(d-tpy)<sub>2</sub>] on **A)** ITO-30, **B)** ITO-50, **C)** FTO on ITO/glass, and **D)** FTO on FTO/glass (solid state, -1V).

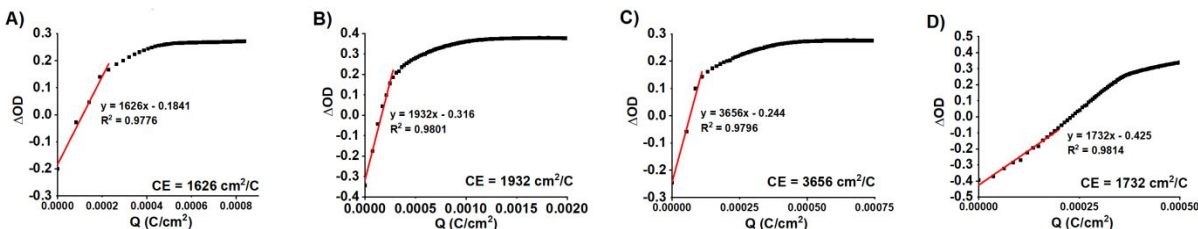

**Figure S23:** Coloration efficiencies for [Fe(t-tpy)<sub>2</sub>] on **A)** ITO-30, **B)** ITO-50, **C)** FTO on ITO/glass, and **D)** FTO on FTO/glass (solid state, -1V).

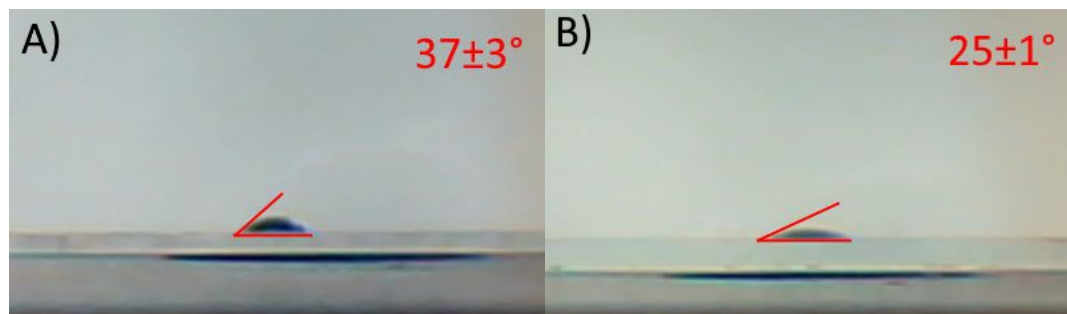

**Figure S24.** Contact angle of acetonitrile drop (1  $\mu\text{L}$ ) on **A)** ITO/glass surface and **B)** FTO/glass surface.

## Electrochemical impedance spectroscopy (EIS)

EIS was measured for the Fe(t-tpy) system on each of the four substrates. The cyclic voltammograms (CVs) for each substrate with and without Fe(t-tpy) were given in **Figure S25A**, and then the impedance compared for the double layer (Dbl) region and the half-wave potential (**Figure S25B**) for the  $[\text{Fe}(\text{t-tpy})_2]$  functionalized films. The solution resistance was subtracted from the system. Here, the half-wave impedance was fit to an equivalent circuit similar to that by Vergaz<sup>6</sup> (**Figure S25E**). The series capacitance (**Figure S25C**) maximizes at the half-wave potential. These values were summarized in **Table 1** where pseudocapacitance was calculated using **Equation S3**. Here,  $C_T$  represents the limiting capacitance,  $C_F$  is the Faradaic component, and  $C_{dl}$  is the double-layer contribution.<sup>7, 8</sup>

$$C_F = C_T - C_{dl} \quad \text{Eq. S3}$$

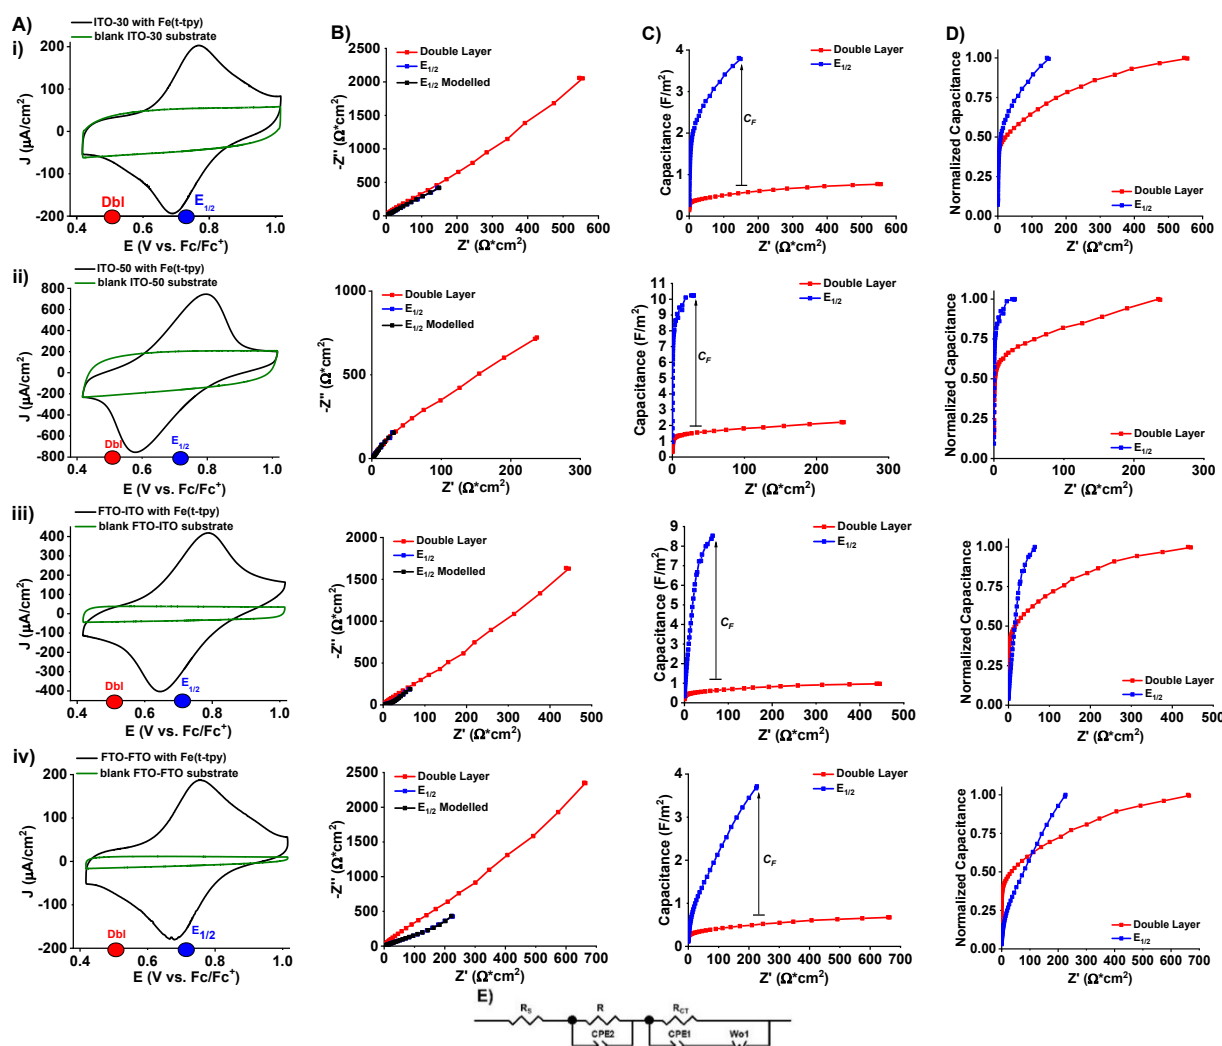

**Figure S25:** EIS data for  $[\text{Fe}(\text{t-tpy})_2]$  on different substrates: **A)** cyclic voltammogram at 50 mV/s, **B)** Nyquist plot, **C)** capacitance plot, and **D)** normalized capacitance plot on **i)** ITO-30/ITO/glass, **ii)** ITO-50/ITO/glass, **iii)** FTO/ITO/glass, and **iv)** FTO/FTO/glass. **E)** the used equivalent circuit.

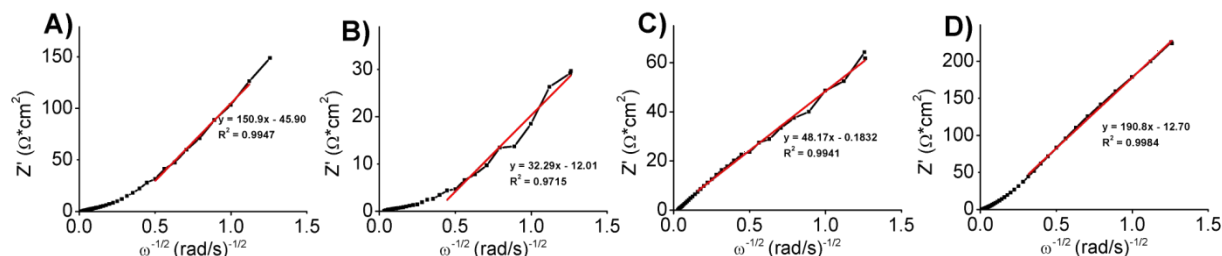

**Figure S26:** The relationship between impedance and reciprocal square root of frequency used for calculations of the Warburg coefficient ( $\sigma$ ) and the diffusion coefficient ( $D$ ). **A)** ITO-30, **B)** ITO-50, **C)** FTO-ITO, and **D)** FTO-FTO

$$Z'(\omega) = \frac{\sigma}{\sqrt{\omega}} \quad \text{Eq. S4}$$

$$\sigma = \frac{RT}{n^2 F^2 A \sqrt{2}} \left( \frac{1}{D^{1/2} C^*} \right) \quad \text{Eq. S5}$$

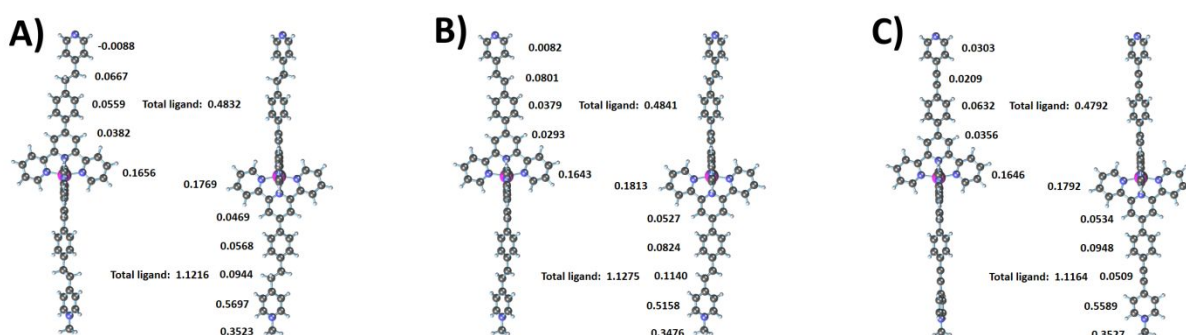

**Figure S27:** Charge distribution in A)  $[\text{Fe}(\text{s-tpy})_2\text{CH}_3]^{3+}$ , B)  $[\text{Fe}(\text{d-tpy})_2\text{CH}_3]^{3+}$ , and C)  $[\text{Fe}(\text{t-tpy})_2\text{CH}_3]^{3+}$ .

## Synthesis of 2,2':2'':6''-Terpyridine-based Ligands

**(E)-4'-(4-(2-(pyridin-4-yl)vinyl)phenyl)-2,2':6',2''-terpyridine aka (d-tpy):**  $t\text{BuOK}$  (2.40 g, 21.4 mmol) was measured out under a direct flow of nitrogen and added into round bottom flask. 3.50 g of 4-(2,2':6',2''-terpyridyl-4')-benzyl(triphenyl)phosphonium bromide (8.71 mmol) was added to 120 mL of anhydrous DMF, and this was added to the reaction mixture. It was stirred at room temperature for 20 minutes, after which 0.50 mL 4-pyridine carboxaldehyde (5.3 mmol) was added forming a dark-orange solution. This was heated at reflux for 4 h, then stirred at room temperature for 3 h. The mixture was extracted with  $\text{CHCl}_3$  (3 x 100 mL) yielding a yellow precipitate. The filtrate was washed with 150 mL chilled  $\text{H}_2\text{O}$  and refrigerated overnight. The organic layer was evaporated under reduced pressure yielding a yellow oil. This was recrystallized in acetone obtaining a yellow solid (Yield: 410 mg, 19%). The ligand was obtained following the literature procedure, the NMR data fits the reported.<sup>9</sup>

FT-IR:  $\nu/\text{cm}^{-1}$  3051w (C-H), 3012w (C-H), 1574vs (C=C-C), 1468s (C=C-C), 1384s (C-H), 1185s (C-H aromatic), 1115s (C-H aromatic), 972s (C-H *trans*), 779vs (C-H aromatic), 706vs (C-H aromatic). UV ( $\text{CH}_3\text{CN}$ ):  $\lambda_{\text{max}}$  ( $\epsilon$ )/ nm ( $\text{L mol}^{-1} \text{cm}^{-1}$ ): 233 ( $2.9 \times 10^4$ ), 251sh ( $2.1 \times 10^4$ ), 285 ( $3.2 \times 10^4$ ), 326 ( $4.9 \times 10^4$ ).

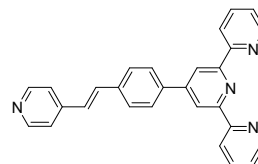



**4'-(4-(2-(pyridin-4-yl)ethyl)phenyl)-2,2':6,2''-terpyridine (s-tpy):** s-Tpy was obtained by the reduction of d-tpy using NaBH<sub>4</sub> and acetic acid in the presence of Pd/C catalyst.<sup>10</sup> It was purified over an alumina column (99:1 CHCl<sub>3</sub>:MeOH). Yield: 95.8 mg, 47.7%.

<sup>1</sup>H NMR (400 MHz, DMSO-d<sub>6</sub>) δ 8.74 (ddd, *J* = 4.7, 1.6, 0.8 Hz, 1H), 8.68 (s, 1H), 8.64 (d, *J* = 7.9 Hz, 1H), 8.44 (dd, *J* = 4.4, 1.6 Hz, 1H), 8.01 (td, *J* = 7.8, 1.8 Hz, 1H), 7.82 (d, *J* = 8.2 Hz, 1H), 7.50 (ddd, *J* = 7.4, 4.8, 1.1 Hz, 1H), 7.43 (d, *J* = 8.2 Hz, 1H), 7.26 (dd, *J* = 4.5, 1.5 Hz, 1H), 3.04 – 2.94 (m, 2H). <sup>13</sup>C NMR (101 MHz, DMSO-d<sub>6</sub>) δ 155.45, 154.77, 149.92, 149.22, 149.13, 149.07, 142.38, 137.25, 134.94, 129.26, 126.59, 124.20, 123.80, 120.72, 117.50, 35.52, 30.47. FT-IR: ν/cm<sup>-1</sup> 3053w (C-H aromatic), 2930s (CH<sub>2</sub>), 2855w (CH<sub>2</sub>), 1585s (C=C-C), 1462s (C=C-C), 1380s (C-N), 1256s (C-N), 1072w (C-H aromatic), 1031w (C-H aromatic), 983w (C=C), 793vs (C-H aromatic), 750s (C-H aromatic), 660s (CH<sub>2</sub>), 618s (CH<sub>2</sub>). UV (CH<sub>3</sub>CN): λ<sub>max</sub>(ε) / nm (L mol<sup>-1</sup> cm<sup>-1</sup>): 228 (2.3x10<sup>4</sup>), 253 (3.2x10<sup>4</sup>), 278 (3.8x10<sup>4</sup>), 315sh (8.9x10<sup>3</sup>).

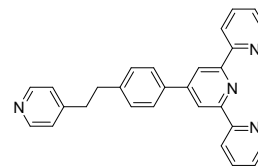

**4'-(4-(pyridin-4-ylethynyl)phenyl)-2,2':6,2''-terpyridine (t-tpy):** obtained according to the literature report, NMR data fits the reported.<sup>11</sup> UV (CH<sub>3</sub>CN): λ<sub>max</sub> (ε) / nm (L mol<sup>-1</sup> cm<sup>-1</sup>): 227 (2.3x10<sup>4</sup>), 255 (1.8x10<sup>4</sup>), 301 (4.0x10<sup>4</sup>).

## Synthesis of Quaternized Ligands

Ligands were synthesized according to the published procedure.<sup>12</sup> The quaternized single bond ligand was obtained as a yellow powder (Yield: 57.8 mg, 57%). The quaternized double bond ligand was obtained as a yellow-orange solid (Yield: 42.4 mg, 75%). The quaternized triple bond ligand was additionally separated over alumina using a mixture of dichloromethane and methanol (95:5). The desired ligand was collected as the second of three elutions, obtaining an orange-brown precipitate (Yield: 22.2 mg, 26%).

### (4-(4-([2,2':6',2''-terpyridin]-4'-yl)phenethyl)-1-methylpyridin-1-ium)I:

<sup>1</sup>H NMR (400 MHz, DMSO) δ 8.86 (d, *J* = 6.5 Hz, 2H), 8.77 (d, *J* = 4.4 Hz, 2H), 8.70 (s, 2H), 8.68 (d, *J* = 8.0 Hz, 2H), 8.09 – 8.01 (m, 4H), 7.88 (d, *J* = 8.1 Hz, 2H), 7.54 (dd, *J* = 7.0, 5.1 Hz, 2H), 7.49 (d, *J* = 8.1 Hz, 2H), 4.28 (s, 3H), 3.29 (d, *J* = 8.0 Hz, 2H), 3.13 (t, *J* = 7.7 Hz, 2H). <sup>13</sup>C NMR (101 MHz, DMSO) δ 160.89, 155.70, 154.95, 149.36, 149.23, 144.83, 141.56, 137.54, 135.47, 129.54, 127.46, 126.97, 124.60, 120.97, 117.74, 47.22, 35.78, 34.32. FT-IR: ν/cm<sup>-1</sup> 3412b (>N-H), 2922w (CH<sub>2</sub>), 2849w (CH<sub>2</sub>), 1637vs (C=C-C), 1582vs (C=C-C), 1562vs (C=C-C), 1520vs (C=C-C), 1462vs (C=C-C), 1382vs (C-N), 1264 (C-N), 1180s (C-H aromatic), 1080s (C-H aromatic), 1031s (C-H aromatic), 983s (C=C), 893s (C-H aromatic), 835vs (C-H aromatic), 789vs (C-H aromatic), 734vs (C-H aromatic), 655vs (C-H aromatic). UV (CH<sub>3</sub>CN): λ<sub>max</sub> (ε) / nm (L mol<sup>-1</sup> cm<sup>-1</sup>): 252 (4.8x10<sup>4</sup>), 278 (4.2x10<sup>4</sup>), 320sh (7.3x10<sup>3</sup>).

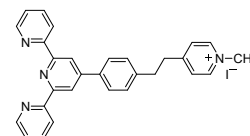

### ((E)-4-(4-([2,2':6',2''-terpyridin]-4'-yl)styryl)-1-methylpyridin-1-ium)I:

<sup>1</sup>H NMR (400 MHz, DMSO) δ 8.91 (d, *J* = 6.7 Hz, 2H), 8.80 – 8.78 (m, 4H), 8.71 (d, *J* = 7.9 Hz, 2H), 8.29 (d, *J* = 6.8 Hz, 2H), 8.16 – 8.10 (m, 2H), 8.07 (dt, *J* = 7.8, 1.8 Hz, 2H), 8.00 – 7.94 (m, 2H), 7.67 (d, *J* = 16.3 Hz, 2H), 7.59 – 7.52 (m, 2H), 4.28 (s, 3H). <sup>13</sup>C NMR (101 MHz, DMSO) δ 154.76, 149.17, 145.06, 143.07, 137.30,

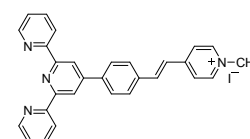

131.31, 131.22, 129.90, 128.87, 128.61, 128.52, 127.52, 124.47, 124.12, 123.53, 118.84, 117.63, 47.56. FT-IR:  $\nu/\text{cm}^{-1}$  3406b (>N-H), 3010vs (C-H), 2942w (CH<sub>3</sub>), 1651vs (C=C), 1611vs (C=C-C), 1574vs (C=C-C), 1515vs (C=C-C), 1472vs (C=C-C), 1386vs (C-N), 1338s (C-H), 1256s (C-N), 1178vs (C-H aromatic), 1119vs (C-H aromatic), 972vs (C-H *trans*), 836vs (C-H aromatic), 779vs (C-H aromatic), 738s (C-H aromatic), 711s (C-H aromatic), 685s (C-H aromatic). UV (CH<sub>3</sub>CN):  $\lambda_{\text{max}}$  ( $\epsilon$ ) / nm (L mol<sup>-1</sup> cm<sup>-1</sup>): 247 (4.5x10<sup>4</sup>), 278 (2.8x10<sup>4</sup>), 361 (3.6x10<sup>4</sup>).

**(4-((4-([2,2':6',2''-terpyridin]-4'-yl)phenyl)ethynyl)-1-methylpyridin-1-ium)I:** <sup>1</sup>H NMR (400 MHz, CD<sub>3</sub>CN)  $\delta$  8.77 (s, 2H), 8.73 – 8.65 (m, 4H), 8.57 (d,  $J$  = 6.6 Hz, 2H), 8.05 – 8.00 (m, 4H), 7.97 (t,  $J$  = 7.7 Hz, 2H), 7.86

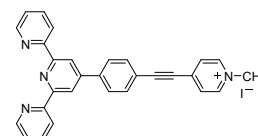

(d,  $J$  = 8.1 Hz, 2H), 7.45 (t,  $J$  = 5.8 Hz, 2H), 4.24 (s, 3H). <sup>13</sup>C NMR (101 MHz, CD<sub>3</sub>CN)  $\delta$  148.80, 146.11, 144.45, 138.30, 138.25, 135.70, 135.60, 134.35, 130.34, 128.73, 126.52, 125.33, 122.81, 122.65, 120.14, 119.37, 108.14, 105.56, 53.66. FT-IR:  $\nu/\text{cm}^{-1}$  2969vs (CH<sub>3</sub>), 2219s (C $\equiv$ C), 1621w (C=C-C), 1580w (C=C-C), 1562w (C=C-C), 1523w (C=C-C), 1460w (C=C-C), 1389w (C-N), 1258vs (C-N), 1084vs (C-H aromatic), 1009vs (C-H aromatic), 785vs (C-H aromatic), 697w (C-H aromatic), 658w (C-H aromatic). UV (CH<sub>3</sub>CN):  $\lambda_{\text{max}}$  ( $\epsilon$ ) / nm (L mol<sup>-1</sup> cm<sup>-1</sup>): 249 (2.2x10<sup>4</sup>), 280 (2.2x10<sup>4</sup>), 348 (1.8x10<sup>4</sup>).

## Synthesis of Iron(II)-Terpyridine Metal Complexes

The corresponding terpyridine ligand was dissolved in acetonitrile, and a half molar amount of Fe(BF<sub>4</sub>)<sub>2</sub>·6H<sub>2</sub>O salts was added. A purple colour was immediately observed upon iron addition. The complex was briefly sonicated, and then the solvent was removed under reduced pressure. Fe(d-Tpy)<sub>2</sub> was obtained according to literature reports.<sup>9</sup>

**[Fe(4'-(4-(2-(pyridin-4-yl)ethyl)phenyl)-2,2':6',2''-**

**terpyridine)<sub>2</sub>](BF<sub>4</sub>)<sub>2</sub> aka [Fe(s-tpy)<sub>2</sub>](BF<sub>4</sub>)<sub>2</sub>:** <sup>1</sup>H NMR

(400 MHz, DMSO-d<sub>6</sub>)  $\delta$  9.61 (s, 4H), 9.02 (d,  $J$  = 8.1 Hz, 4H), 8.61 (d,  $J$  = 4.5 Hz, 4H), 8.45 (d,  $J$  = 7.7 Hz, 4H), 7.99 (t,  $J$  = 7.7 Hz, 4H), 7.63 (d,  $J$  = 8.0 Hz, 4H), 7.57 (s, 4H), 7.23 (d,  $J$  = 5.2 Hz, 4H), 7.15 (t,  $J$  = 6.2 Hz, 4H), 3.17 (s, 4H). <sup>13</sup>C NMR (101 MHz, DMSO)  $\delta$  160.30, 158.35, 156.85, 153.22, 141.63, 139.18, 134.06, 130.05, 128.15, 128.00, 125.60, 124.51, 121.19, 100.82, 99.13, 36.30, 35.47. [M]<sup>2+</sup> Calc for C<sub>56</sub>H<sub>44</sub>FeN<sub>8</sub> 442.15137; Found 442.15127. [M+2H]<sup>2+</sup> Calc for C<sub>56</sub>H<sub>44</sub>FeN<sub>8</sub> 443.157276; Found 443.15360. FT-IR:  $\nu/\text{cm}^{-1}$  3396b (>N-H), 3075w (C-H aromatic), 2922w (CH<sub>2</sub>), 2853w (CH<sub>2</sub>), 1613s (C=C-C), 1411s (C=C-C), 1048vs (C-H aromatic), 832s (C-H aromatic), 785s (C-H aromatic), 732vs (C-H aromatic), 654vs (C-H aromatic). UV (CH<sub>3</sub>CN):  $\lambda_{\text{max}}$  ( $\epsilon$ ) / nm (L mol<sup>-1</sup> cm<sup>-1</sup>): 286 (7.2x10<sup>4</sup>), 308sh (6.3x10<sup>4</sup>), 321 (6.6x10<sup>4</sup>), 568 (2.6x10<sup>4</sup>).

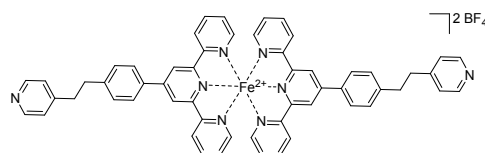

**[Fe(*E*)-4'-(4-(2-(pyridin-4-yl)vinyl)phenyl)-2,2':6',2''-**

**terpyridine)<sub>2</sub>](BF<sub>4</sub>)<sub>2</sub> aka [Fe(d-tpy)<sub>2</sub>](BF<sub>4</sub>)<sub>2</sub>:** <sup>1</sup>H NMR

(400 MHz, DMSO-d<sub>6</sub>)  $\delta$  9.74 (s, 1H), 9.10 (d,  $J$  = 8.1 Hz, 1H), 8.69 – 8.63 (m, 2H), 8.12 (d,  $J$  = 8.5 Hz, 1H), 8.05 (td,  $J$  = 7.8, 1.4 Hz, 1H), 7.78 (d,  $J$  = 16.4 Hz, 1H), 7.68 (dd,  $J$  = 4.7, 1.5 Hz, 1H), 7.59 (d,  $J$  = 16.4 Hz, 1H), 7.30 (d,  $J$  = 5.5 Hz, 1H), 7.22 – 7.18 (m, 1H). <sup>13</sup>C NMR (101 MHz, DMSO-d<sub>6</sub>)  $\delta$  160.13, 158.10, 155.80, 153.01, 150.41, 148.32, 144.26, 138.99, 138.76, 135.79, 132.32, 128.38, 128.29, 127.80, 124.32, 121.23, 120.94. FT-IR:  $\nu/\text{cm}^{-1}$  3548b (>N-

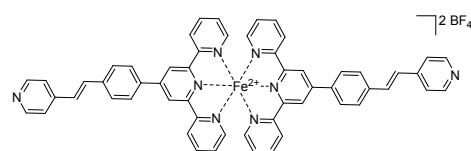

H), 3080b (C-H aromatic), 1695s (C=C-C), 1619s (C=C), 1421s (C=C-C), 1040vs (C-H aromatic), 796vs (C-H aromatic), 614s (C-H aromatic). UV (CH<sub>3</sub>CN):  $\lambda_{\text{max}}$  ( $\epsilon$ ) / nm (L mol<sup>-1</sup> cm<sup>-1</sup>): 243sh (3.7x10<sup>4</sup>), 287 (5.0x10<sup>4</sup>), 323sh (6.9x10<sup>4</sup>), 340 (7.5x10<sup>4</sup>), 362sh (6.4x10<sup>4</sup>), 574 (3.1x10<sup>4</sup>).

**[Fe(4'-(4-(pyridin-4-ylethynyl)phenyl)-2,2':6',2''-**

**terpyridine)]<sub>2</sub>(BF<sub>4</sub>)<sub>2</sub> aka [Fe(t-tpy)]<sub>2</sub>(BF<sub>4</sub>)<sub>2</sub>: <sup>1</sup>H NMR (400 MHz, DMSO)  $\delta$  9.76 (s, 4H), 9.10 (d,  $J$  = 7.6 Hz, 4H), 8.83 – 8.65 (m, 8H), 8.17 – 8.00 (m, 8H), 7.69 (s, 4H), 7.30 (d,  $J$**

= 4.5 Hz, 4H), 7.21 (d,  $J$  = 6.5 Hz, 4H). <sup>13</sup>C NMR (101 MHz, DMSO)  $\delta$  160.51, 158.29, 153.34, 150.51, 150.07, 139.33, 137.26, 133.31, 128.62, 128.09, 126.12, 124.68, 123.78, 121.46, 110.78, 73.06, 68.54 FT-IR:  $\nu/\text{cm}^{-1}$  3538b (>N-H), 3077w (C-H aromatic), 2207s (C $\equiv$ C), 1607s (C=C-C), 1403s (C=C-C), 1033vs (C-H aromatic), 777vs (C-H aromatic), 618s (C-H aromatic). UV (CH<sub>3</sub>CN):  $\lambda_{\text{max}}$  ( $\epsilon$ ) / L mol<sup>-1</sup> cm<sup>-1</sup> 242sh (3.5x10<sup>4</sup>), 288 (4.8x10<sup>4</sup>), 325 (7.1x10<sup>4</sup>), 574 (2.5x10<sup>4</sup>).

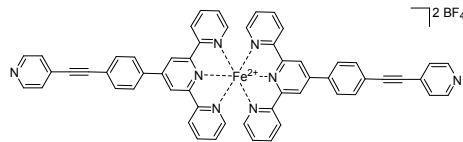

**[Fe(4-(4-([2,2':6',2''-terpyridin]-4'-yl)phenethyl)-1-methylpyridin-1-ium)]<sub>2</sub>(BF<sub>4</sub>)<sub>2</sub> aka [Fe(CH<sub>3</sub>-s-**

**tpy)]<sub>2</sub>I<sub>2</sub>(BF<sub>4</sub>)<sub>2</sub>: <sup>1</sup>H NMR (400 MHz, DMSO)  $\delta$  9.67 (s, 4H), 9.07 (d,  $J$  = 8.2 Hz, 4H), 8.94 (d,  $J$  = 6.6 Hz, 4H), 8.52 (t,  $J$  = 9.5 Hz, 4H), 8.15 (d,  $J$  = 6.4 Hz, 4H), 8.05 (t,  $J$  = 7.7 Hz, 4H), 7.74 (d,  $J$  = 8.1 Hz, 4H), 7.27 (q,  $J$  = 6.3 Hz, 4H), 7.20 (t,  $J$  = 6.4 Hz, 4H), 4.33 (s, 6H), 3.27 – 3.21 (m, 8H). <sup>13</sup>C NMR (101 MHz, DMSO)  $\delta$  165.65, 159.26, 155.21, 154.34, 147.79, 145.43, 139.65, 139.34, 130.43, 129.95, 128.34, 127.93, 127.40, 124.53, 119.78, 44.75, 39.36. FT-IR:  $\nu/\text{cm}^{-1}$  2963s (CH<sub>3</sub>), 1625w (C=C-C), 1556w (C=C-C), 1521w (C=C-C), 1476w (C=C-C), 1382w (CH<sub>3</sub>), 1258vs (C-N), 1080vs (C-H aromatic), 1017vs (C-H aromatic), 793vs (C-H aromatic). UV (CH<sub>3</sub>CN):  $\lambda_{\text{max}}$  ( $\epsilon$ ) / nm (L mol<sup>-1</sup> cm<sup>-1</sup>): 247 (8.0x10<sup>4</sup>), 285 (8.8x10<sup>4</sup>), 320 (6.5x10<sup>4</sup>), 368sh (9.6x10<sup>3</sup>), 569 (2.7x10<sup>4</sup>).**

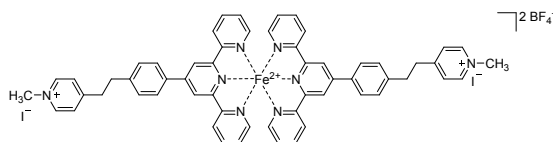

**[Fe(E)-4-(4-([2,2':6',2''-terpyridin]-4'-yl)styryl)-1-methylpyridin-1-ium)]<sub>2</sub>(BF<sub>4</sub>)<sub>2</sub> aka [Fe(CH<sub>3</sub>-d-**

**tpy)]<sub>2</sub>I<sub>2</sub>(BF<sub>4</sub>)<sub>2</sub>: <sup>1</sup>H NMR (400 MHz, DMSO)  $\delta$  9.77 (s, 4H), 9.11 (d,  $J$  = 8.0 Hz, 4H), 8.96 (d,  $J$  = 6.5 Hz, 4H), 8.74 (d,  $J$  = 7.9 Hz, 4H), 8.33 (d,  $J$  = 6.5 Hz, 4H), 8.20 (d,  $J$  = 6.4 Hz, 4H), 8.06 (d,  $J$  = 7.6 Hz, 4H), 7.67 – 7.59 (m, 4H), 7.59 – 7.53 (m, 4H), 7.30 (dd,  $J$  = 12.2, 7.2 Hz, 2H), 7.22 (dd,  $J$  = 13.3, 6.2 Hz, 2H), 4.33 (s, 6H). <sup>13</sup>C NMR (101 MHz, DMSO)  $\delta$  159.15, 157.65, 156.10, 152.33, 145.18, 145.05, 138.64, 135.96, 135.24, 131.83, 131.22, 129.22, 128.23, 127.08, 125.70, 123.58, 119.21, 50.12. FT-IR:  $\nu/\text{cm}^{-1}$  3410b (>N-H), 3008vs (C-H), 2942w (CH<sub>3</sub>), 1647vs (C=C), 1616vs (C=C-C), 1515vs (C=C-C), 1462vs (C=C-C), 1405s (C-H), 1180s (C-H aromatic), 1076vs (C-H aromatic), 834vs (C-H aromatic), 785vs (C-H aromatic), 751s (C-H aromatic). UV (CH<sub>3</sub>CN):  $\lambda_{\text{max}}$  ( $\epsilon$ ) / nm (L mol<sup>-1</sup> cm<sup>-1</sup>): 249 (1.0x10<sup>5</sup>), 284 (7.0x10<sup>4</sup>), 360 (9.7x10<sup>4</sup>), 577 (2.7x10<sup>4</sup>).**

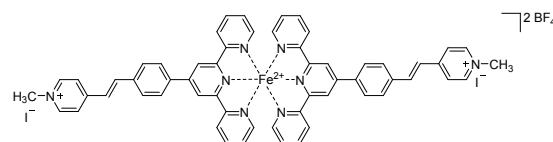

**[Fe((4-((4-([2,2':6',2''-terpyridin]-4'-yl)phenyl)ethynyl)-1-methylpyridin-1-**

**ium)]<sub>2</sub>(BF<sub>4</sub>)<sub>2</sub> aka [Fe(CH<sub>3</sub>-t-tpy)]<sub>2</sub>I<sub>2</sub>(BF<sub>4</sub>)<sub>2</sub>: <sup>1</sup>H NMR (400 MHz, CD<sub>3</sub>CN)  $\delta$  9.20 (s, 4H), 8.62 (d,  $J$  = 5.8 Hz, 8H), 8.48 – 8.34 (m, 4H), 8.09 (d,  $J$  = 5.3 Hz, 8H), 7.91 (s, 4H), 7.18 (s, 4H), 7.08 (s,**

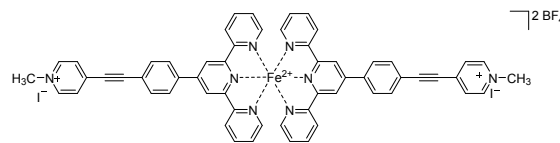

4H), 4.29 (s, 4H), 2.06 (s, 2H).  $^{13}\text{C}$  NMR (101 MHz,  $\text{CD}_3\text{CN}$ )  $\delta$  161.32, 158.89, 154.22, 149.85, 146.41, 139.97, 139.80, 134.75, 130.49, 129.53, 128.87, 128.43, 124.99, 122.70, 113.16, 87.53, 49.15, 30.77. FT-IR:  $\nu/\text{cm}^{-1}$  3404 (>N-H), 3029w (C-H aromatic), 2961s ( $\text{CH}_3$ ), 2217s ( $\text{C}\equiv\text{C}$ ), 2184w ( $\text{C}\equiv\text{C}$ ), 1640s (C=C-C), 1605s (C=C-C), 1519s (C=C-C), 1466s (C=C-C), 1403s (C=C-C), 1250vs (C-N), 1072vs (C-H aromatic), 1013vs (C-H aromatic), 781vs (C-H aromatic). UV ( $\text{CH}_3\text{CN}$ ):  $\lambda_{\text{max}}$  ( $\epsilon$ ) / nm ( $\text{L mol}^{-1} \text{cm}^{-1}$ ): 242 ( $5.3 \times 10^4$ ), 285 ( $5.7 \times 10^4$ ), 335 ( $7.3 \times 10^4$ ), 576 ( $2.6 \times 10^4$ ).

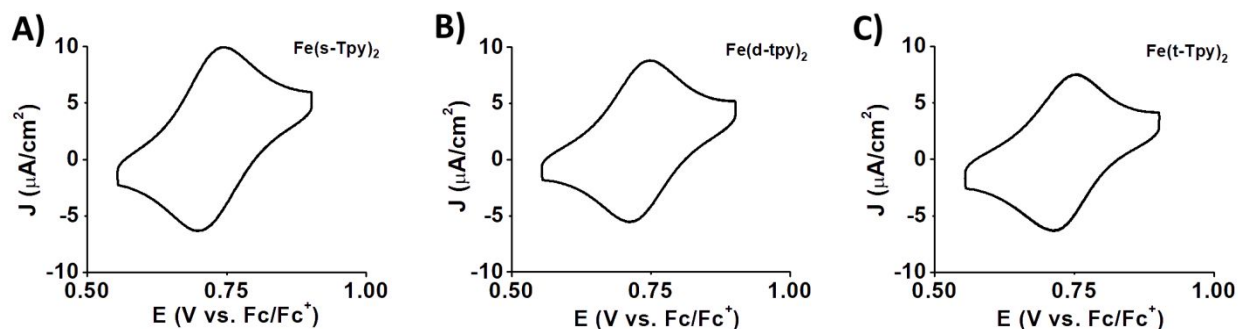

**Figure S28:** CVs of 0.1 mM complexes in solution at 50 mV/s (0.1 M TBAHFP/MeCN): A)  $\text{Fe}(\text{s-tpy})_2(\text{BF}_4)_2$ , B)  $\text{Fe}(\text{d-tpy})_2(\text{BF}_4)_2$ , and C)  $\text{Fe}(\text{t-tpy})_2(\text{BF}_4)_2$ .

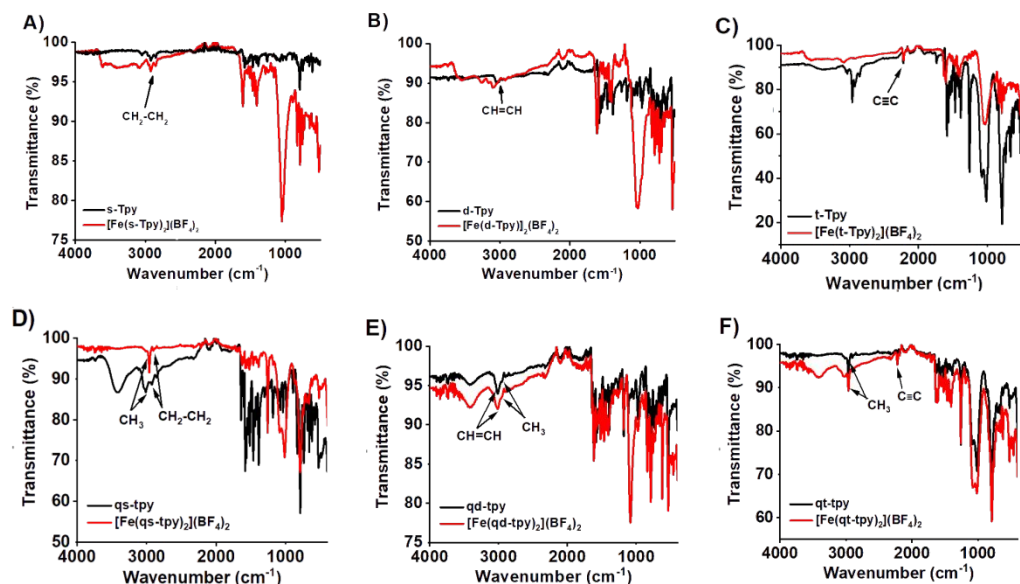

**Figure S29:** IR spectrum of tpy ligands and Fe-tpy complexes: a) s-tpy, b) d-tpy, c) t-tpy, d) qs-tpy, e) qd-tpy, f) qt-tpy).

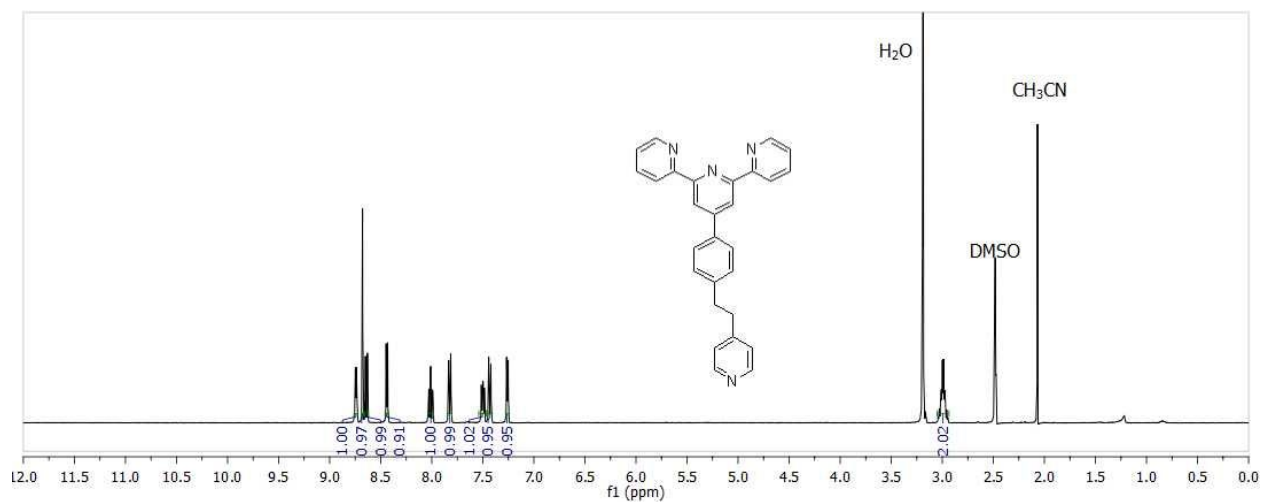

**Figure S30:**  $^1\text{H}$  NMR spectrum of s-tpy.

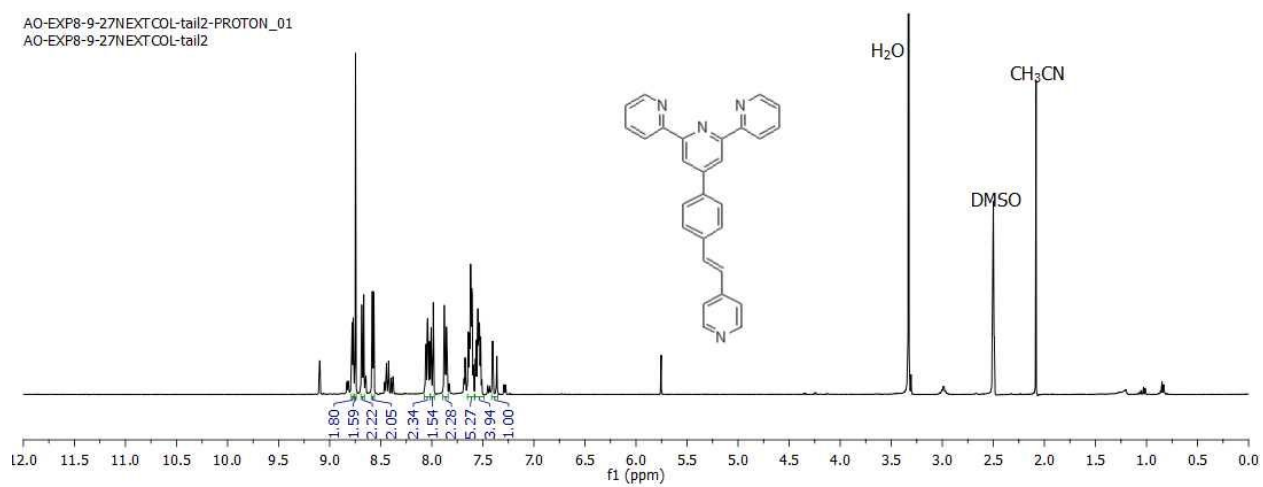

**Figure S31:**  $^1\text{H}$  NMR spectrum of d-tpy.

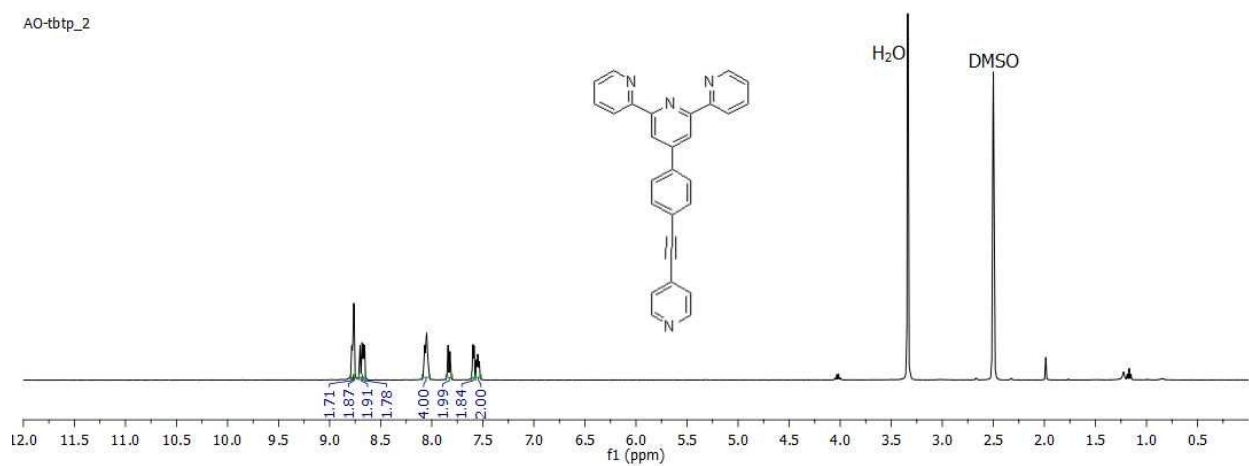

**Figure S32:**  $^1\text{H}$  NMR spectrum of t-tpy.

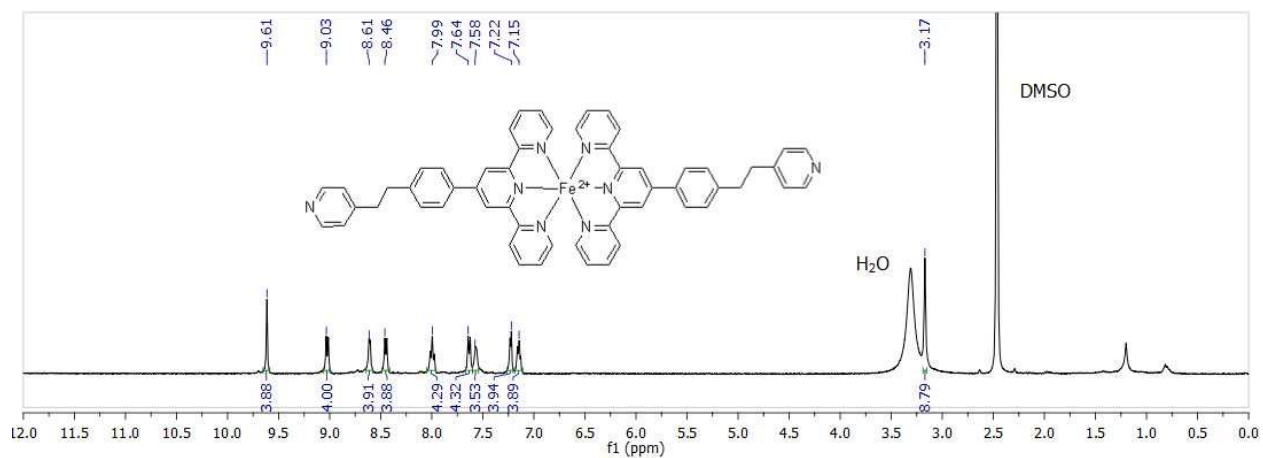

Figure S33: <sup>1</sup>H NMR spectrum of [Fe(s-tpy)<sub>2</sub>](BF<sub>4</sub>)<sub>2</sub>.

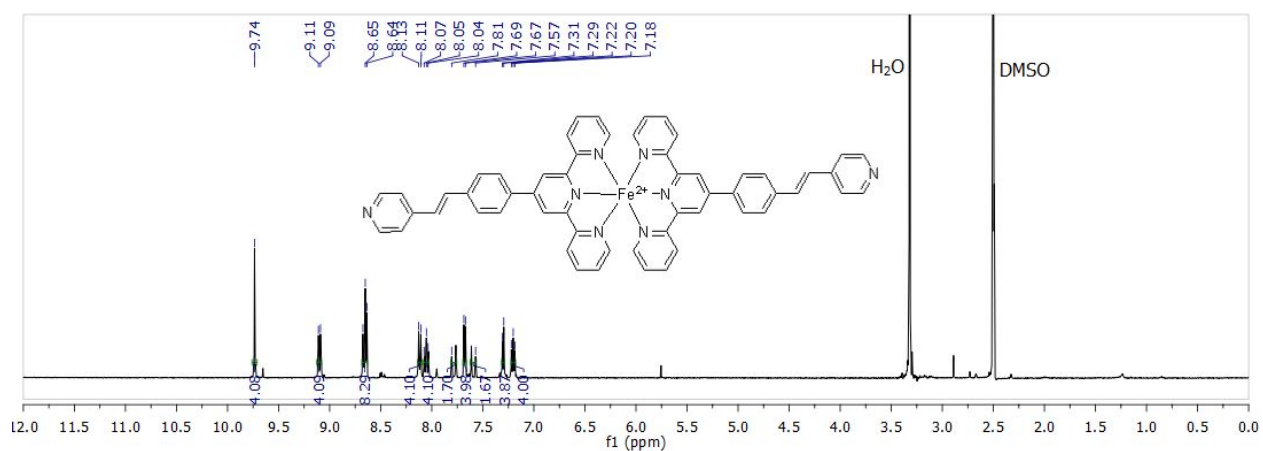

Figure S34: <sup>1</sup>H NMR spectrum of [Fe(d-tpy)<sub>2</sub>](BF<sub>4</sub>)<sub>2</sub>.

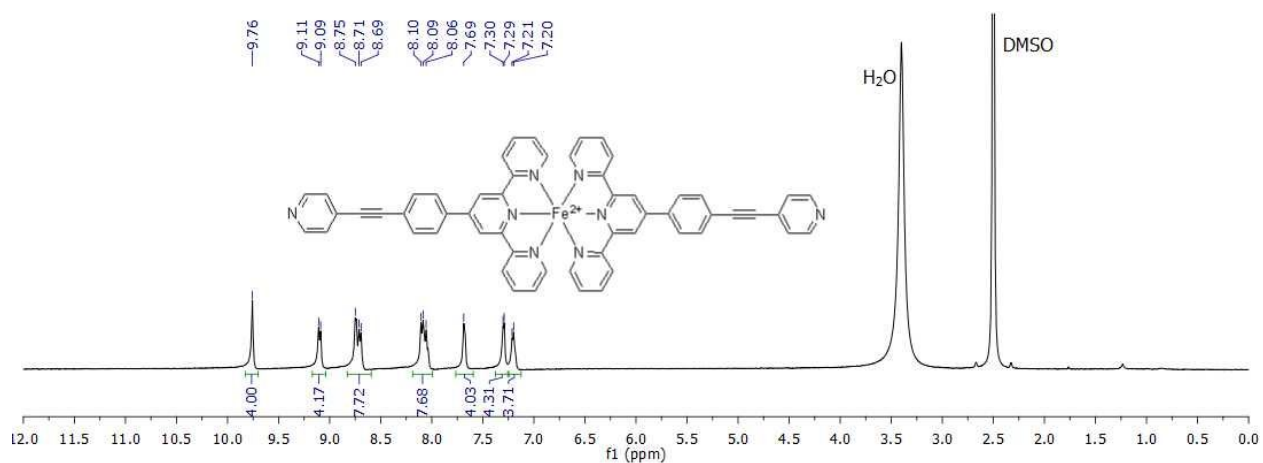

Figure S35: <sup>1</sup>H NMR spectrum of [Fe(t-tpy)<sub>2</sub>](BF<sub>4</sub>)<sub>2</sub>.

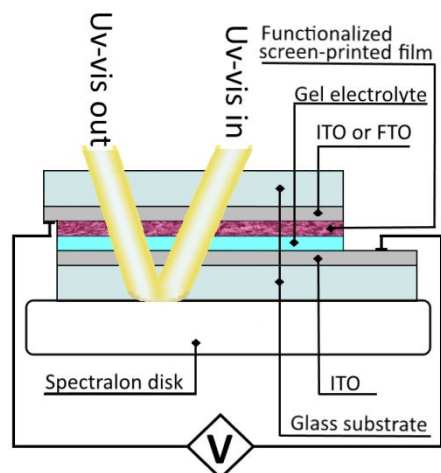

**Figure S36:** A sketch of solid-state setup of ECDs.

## References

- (1) Laschuk, N. O.; Ebralidze, I. I.; Poisson, J.; Egan, J. G.; Quaranta, S.; Allan, J. T.; Cusden, H.; Gaspari, F.; Naumkin, F.; Easton, E. B.; Zenkina, O. V., Ligand Impact on Monolayer Electrochromic Materials Properties *ACS Appl. Mater. Interfaces* **2018**, *10* (41), 35334–35343.
- (2) Senthilkumar, V.; Vickraman, P.; Ravikumar, R., Synthesis of fluorine doped tin oxide nanoparticles by sol–gel technique and their characterization. *J. Sol-Gel Sci. Technol.* **2010**, *53* (2), 316-321.
- (3) Eckermann, A. L.; Feld, D. J.; Shaw, J. A.; Meade, T. J., Electrochemistry of Redox-active Self-assembled Monolayers. *Coord. Chem. Rev.* **2010**, *254* (15), 1769-1802.
- (4) Allan, J. T. S.; Quaranta, S.; Ebralidze, I. I.; Egan, J. G.; Poisson, J.; Laschuk, N. O.; Gaspari, F.; Easton, E. B.; Zenkina, O. V., Terpyridine-based monolayer electrochromic materials. *ACS Appl. Mater. Interfaces* **2017**, *9* (46), 40438-40445.
- (5) Wang, G.; Zhang, L.; Zhang, J., A review of electrode materials for electrochemical supercapacitors. *Chemical Society Reviews* **2012**, *41* (2), 797-828.
- (6) Ricardo Vergaz; J. M. S. Pena; David Barrios; Vázquez, C., Electrical analysis of new all-plastic electrochromic devices. *Optical Engineering* **2006**, *45* (11).
- (7) Reid, O. R. O.; Saleh, F. S.; Easton, E. B., Application of the transmission line EIS model to fuel cell catalyst layer durability. *ECS trans* **2014**, *61* (23), 25-32.
- (8) Reid, O. R.; Saleh, F. S.; Easton, E. B., Determining Electrochemically Active Surface Area in PEM Fuel Cell Electrodes with Electrochemical Impedance Spectroscopy and its Application to Catalyst Durability. *Electrochim. Acta* **2013**, *114*, 278-284.
- (9) Santos, J. J.; Toma, S. H.; Lalli, P. M.; Riccio, M. F.; Eberlin, M. N.; Toma, H. E.; Araki, K., Exploring the coordination chemistry of isomerizable terpyridine derivatives for successful analyses of cis and trans isomers by travelling wave ion mobility mass spectrometry. *Analyst* **2012**, *137* (17), 4045-4051.
- (10) Tran, A. T.; Huynh, V. A.; Friz, E. M.; Whitney, S. K.; Cordes, D. B., A general method for the rapid reduction of alkenes and alkynes using sodium borohydride, acetic acid, and palladium. *Tetrahedron Lett.* **2009**, *50* (16), 1817-1819.

- (11) Saha, M. L.; Bats, J. W.; Schmittel, M., Merging strong and weak coordination motifs in the integrative self-sorting of a 5-component trapezoid and scalene triangle. *Org. Biomol. Chem.* **2013**, *11* (34), 5549–5736.
- (12) Goodall, W.; Williams, J. A. G., Iridium(III) bis-terpyridine complexes incorporating pendent N-methylpyridinium groups: luminescent sensors for chloride ions. *J. Chem. Soc., Dalton Trans.* **2000**, (17), 2893-2895.
